# Supplementary material for: The dynamics of genome replication using deep sequencing
Source: PubMed Central journal article supplement (PMC3874191; doi:10.1093/nar/gkt878), 2013-10-01
Supplement: supp_gkt878_nar-02258-met-k-2013-File008.pdf [file supp_gkt878_nar-02258-met-k-2013-File008.pdf]

## Supplementary legends

**Figure S1: DNA copy number changes in a checkpoint mutant subjected to HU.** DNA copy number increase is restricted to origin proximal regions. The plots show the ratio between uniquely mapped sequencing reads from a G1 and S-phase sample, normalized to a baseline of 1. Regions lacking data are non-unique sequences where reads were not mapped. Black dots are the raw data points in 1 kb windows. Fourier transformation was applied to generate the smoothed profiles, shown in solid grey. Open circles represent known replication origin locations; arrows represent peak calls.

**Figure S2: Mcm4 ChIP-seq data.** Profile showing the enrichment of Mcm4 bound sequences in alpha factor arrested cells.

**Figure S3: Scatter plots for comparisons between HU peak height and origin replication time.** For each origin identified as a peak in the HU dataset the origin replication time is plotted against the HU peak height. (left) The median replication time (Trep in min, from time course analysis) is used as a measure of origin replication time. (right) The inferred mean origin activation time (Yang et al., 2010) is used as a measure of origin activation time. In each case correlation coefficients are given.

**Figure S4: Time course analysis of genome replication.** *S. cerevisiae* genome replication dynamics from seven time points through a synchronous S-phase (each normalized to the alpha factor arrest): 25 min (light blue), 30 min (red), 35 min (blue), 40 min (gold), 45 min (green), 50 min (violet) and 90 min (grey). Open circles represent known replication origin locations.

**Figure S5: Median replication time from time course data.** Open circles represent known replication origin locations.

**Figure S6: Scatter plots for pairwise comparisons between the copy number approaches to measuring genome replication and two published studies (16,17).** Correlation coefficients are given for each comparison.

**Figure S7: Distance to nearest confirmed replication origin for peak calls from Trep data.**

**Figure S8: Comparisons of sort-seq biological replicates.** Relative copy number replication profiles for diploid *S. cerevisiae*. Replicate 1 (SOLiD sequencing) data points are shown in black, replicate 2 (Illumina sequencing) in red. Dots are raw data points in 1 kb windows.

**Figure S9: Sort-seq analysis reveals identical replication dynamics in haploids and diploids.** Relative copy number replication profiles from sort-seq for the *S. cerevisiae* genome. Dots are raw data points in 1 kb windows and lines show smoothed profiles (black for diploid, grey for haploid). Bars above the profile indicate 1 kb windows that are significantly different (black for  $p < 0.001$ ; grey for  $p < 0.01$ ).

**Figure S10: Direct measurement of genome replication in exponentially growing cells.** Marker frequency analysis as a proxy for replication time. Grey dots are the raw data points (in 1 kb windows) and the line shows the smoothed profile (left y-axis scale). Black dots show relative copy number from the (Illumina) sort-seq experiment (right y-axis scale). Open circles represent known replication origin locations; blue bars indicate centromere locations.

**Table S1: Summary of deep sequencing experiments.** Six different experiments are presented with the strain name and pertinent information from each genotype shown. For each experiment the following summary information is presented: the sequencing technology; the strain name; library construction method; a sample description; the mean DNA copy number as measured by flow cytometry (N/A – not applicable); total reads generated; and the total number of reads that mapped uniquely within the nuclear genome. In each case 50 bp sequencing reads were obtained.

**Table S2: Genotypes of strains used in this study.**

**Table S3: Details of confirmed essential sequence elements at 102 replication origins.**

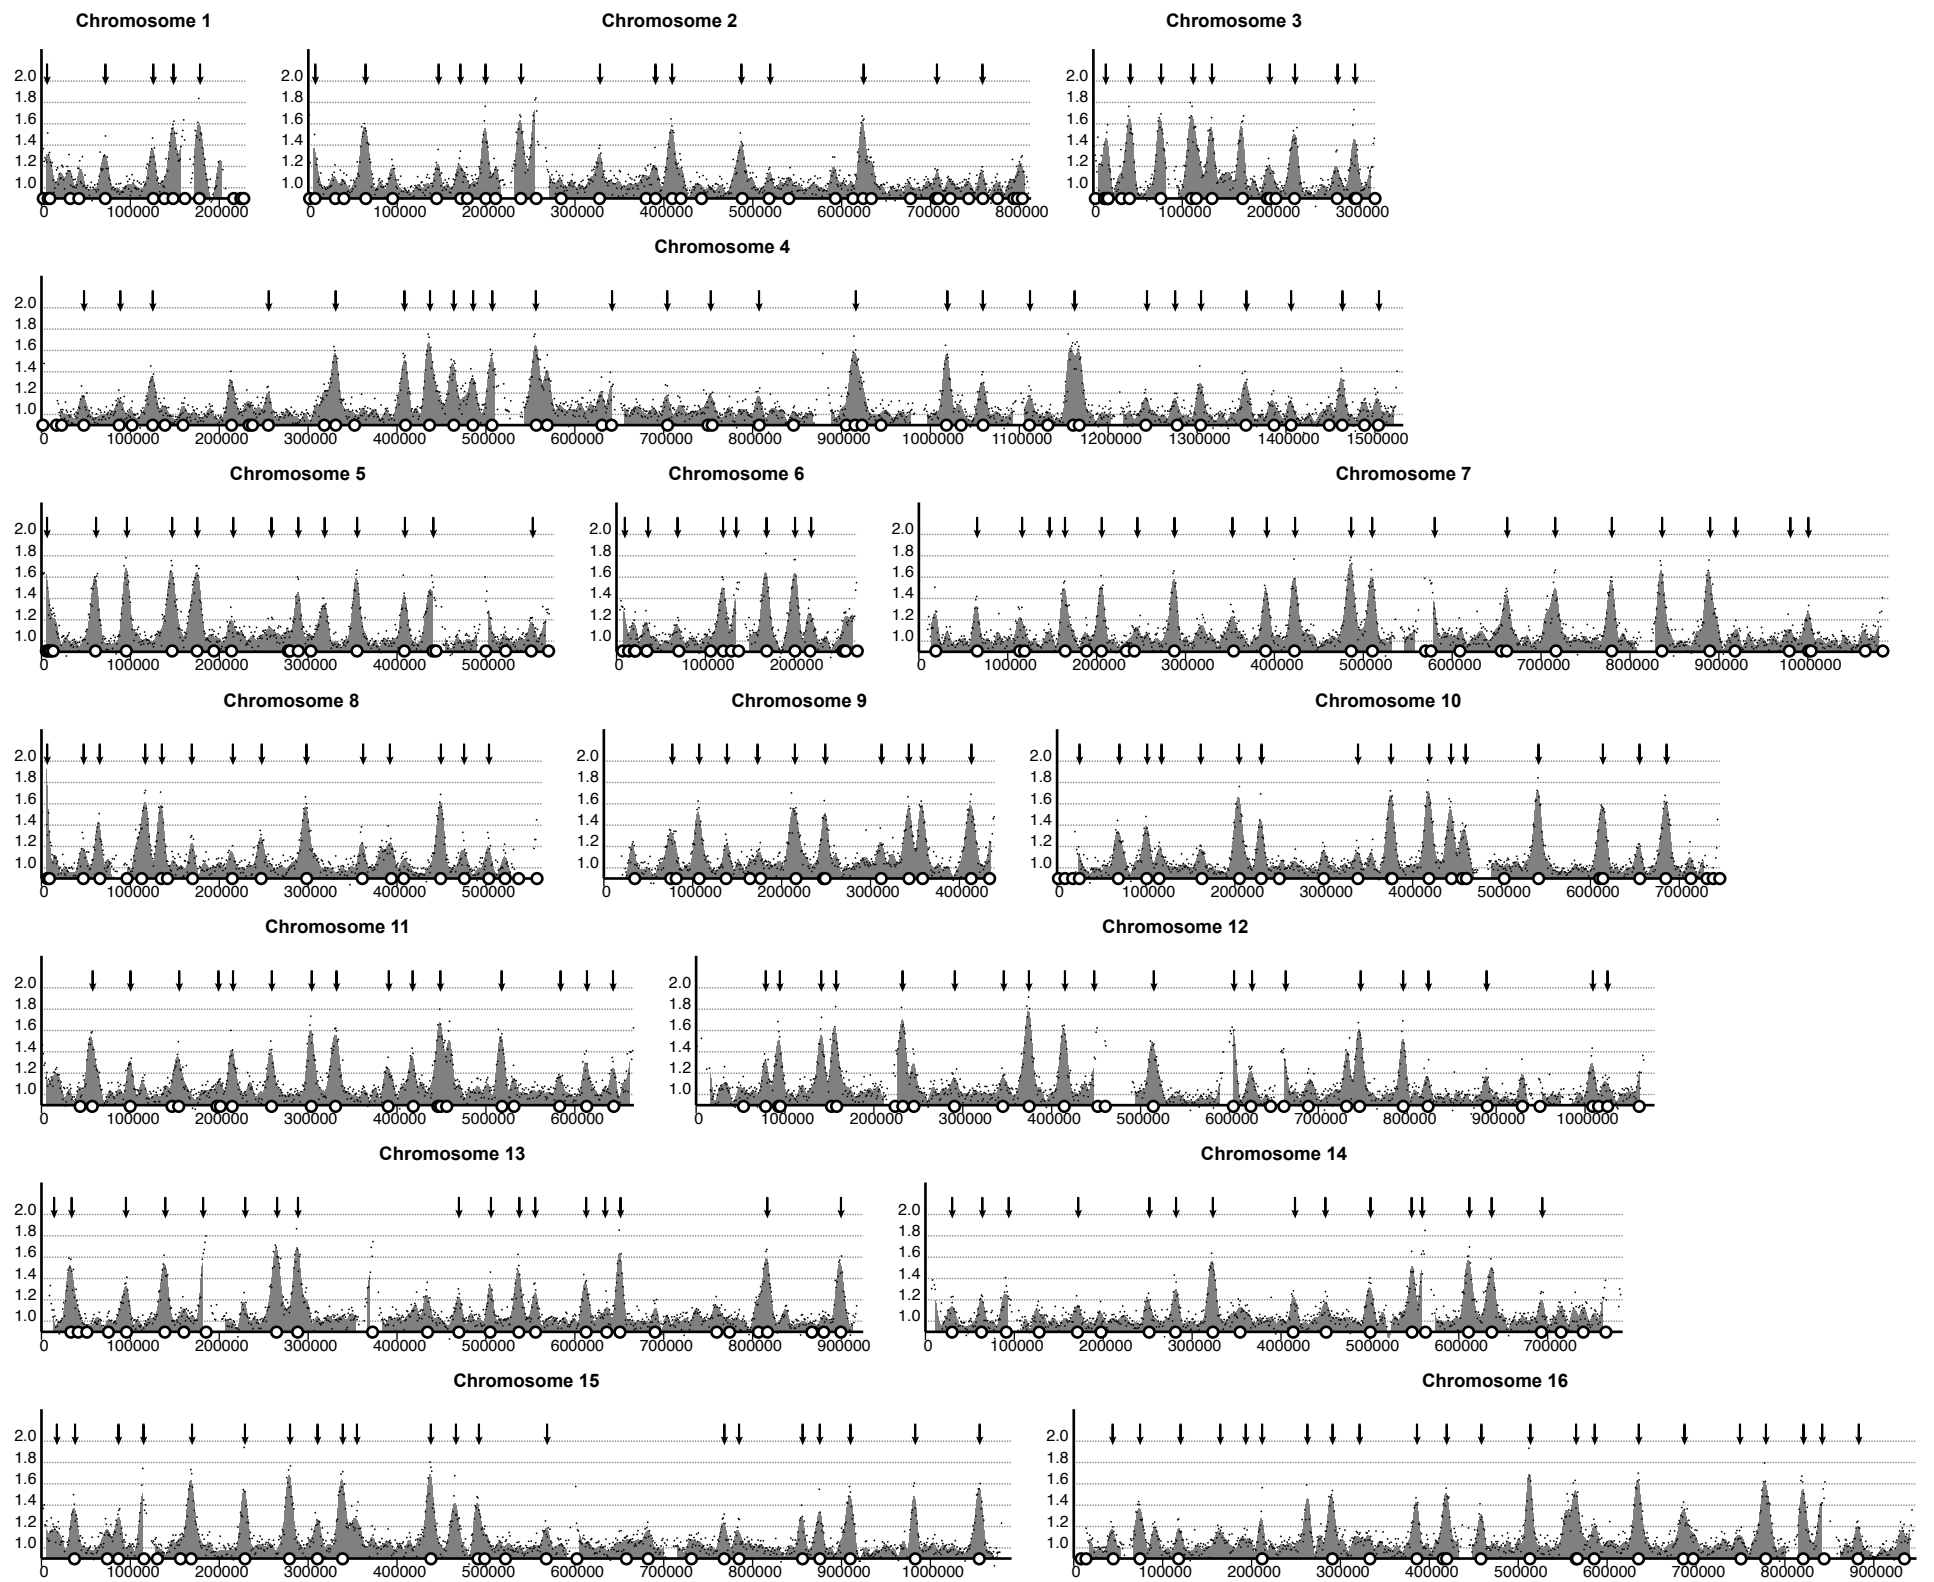











chrIV\_1

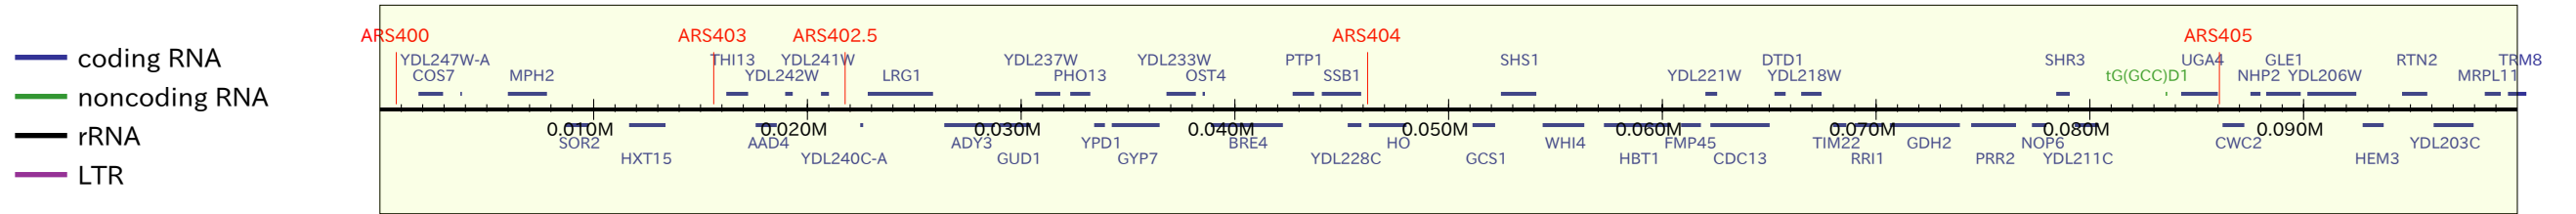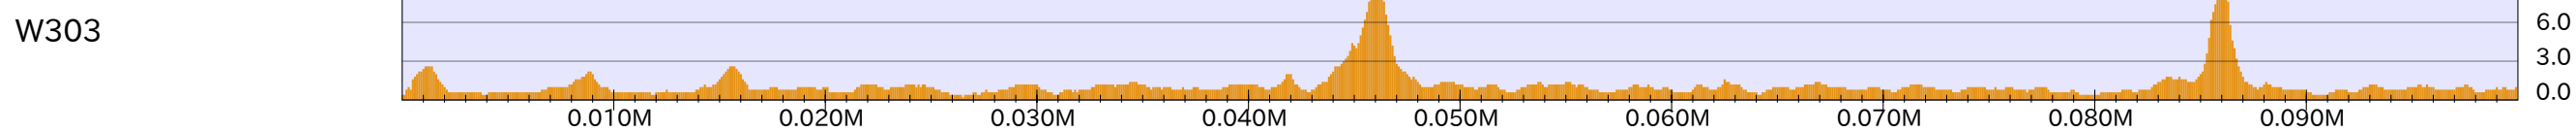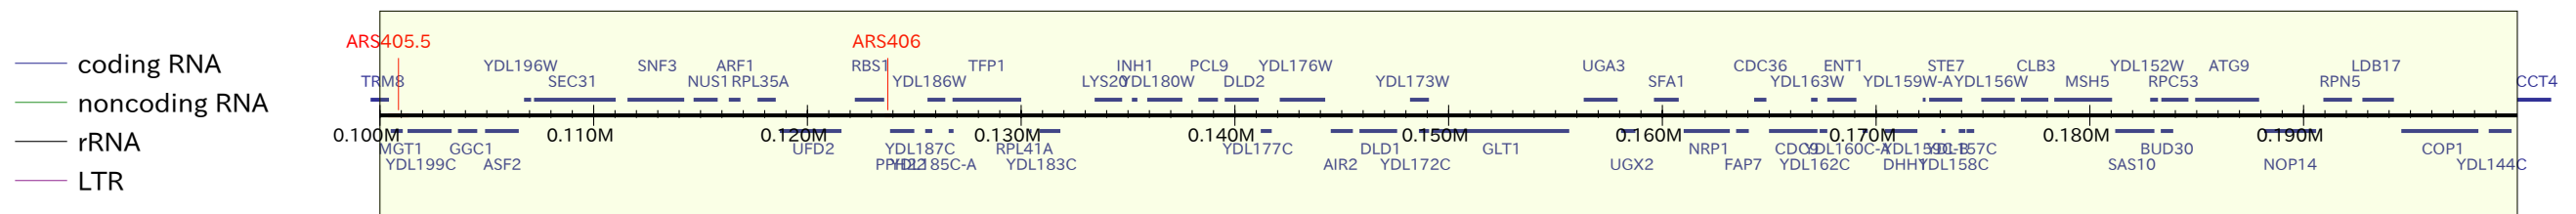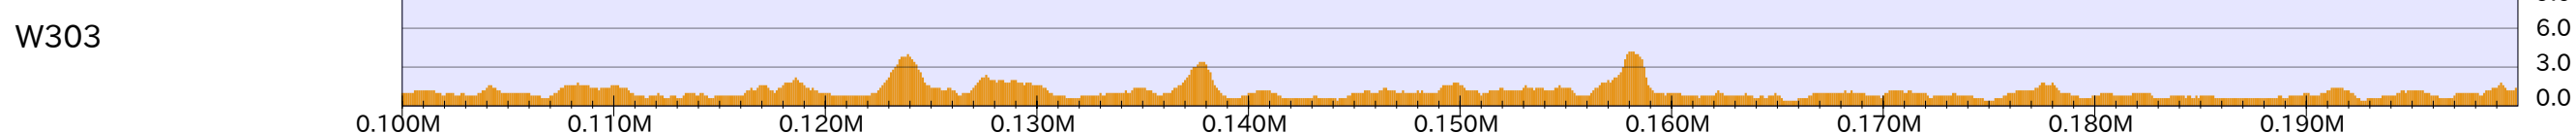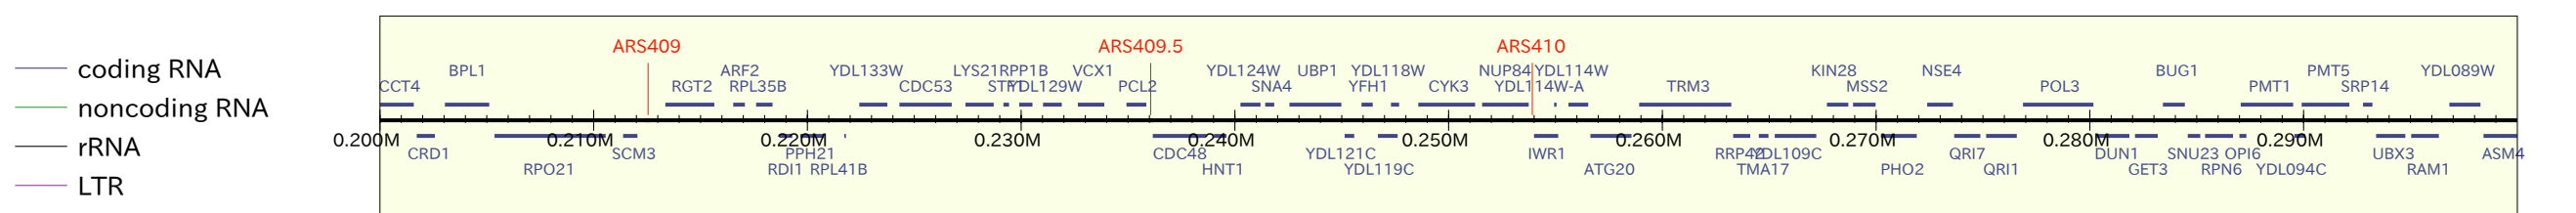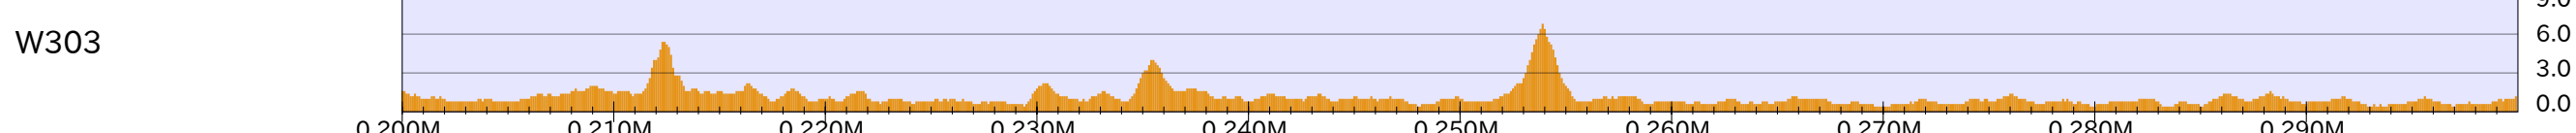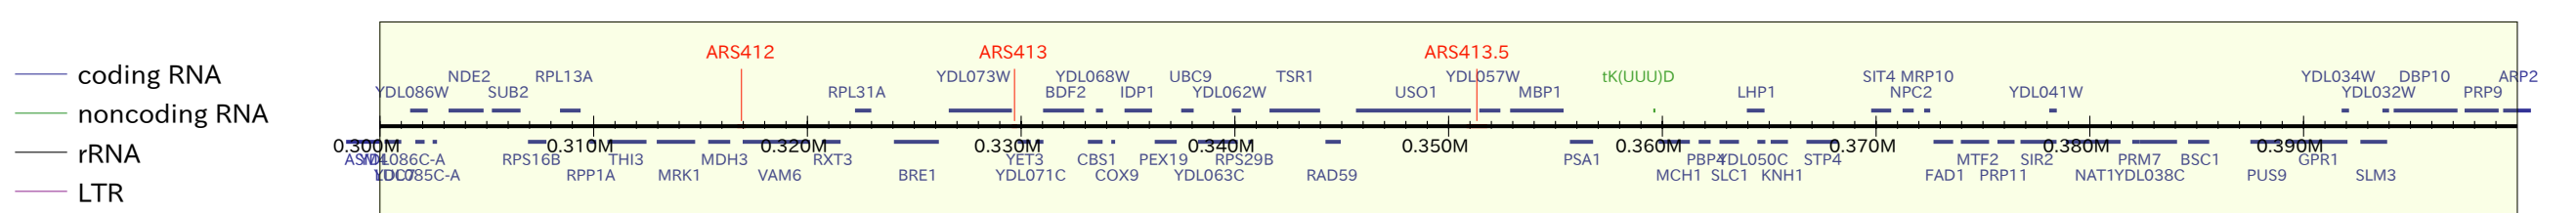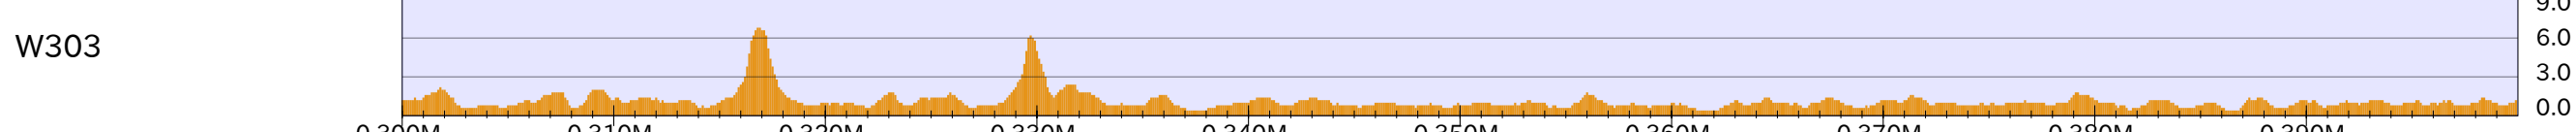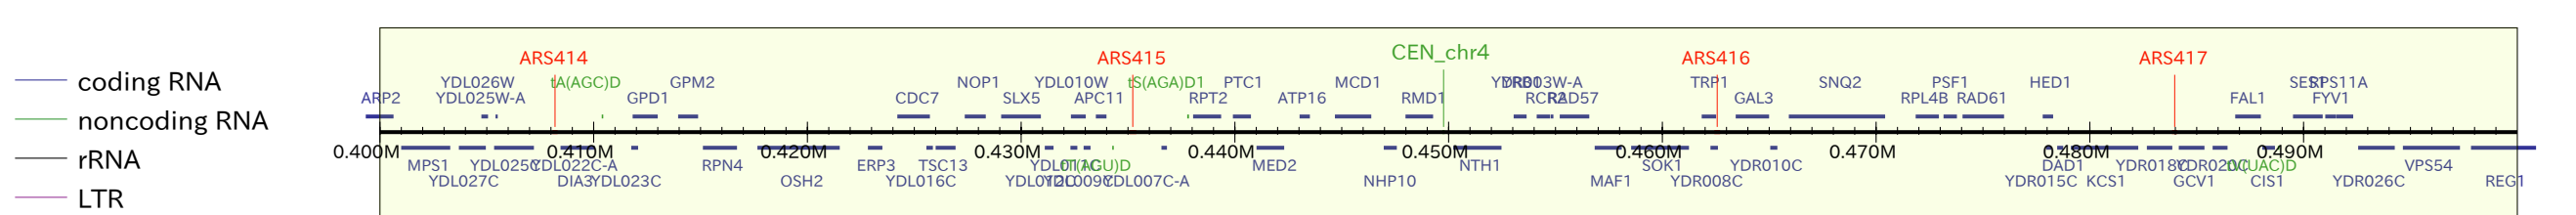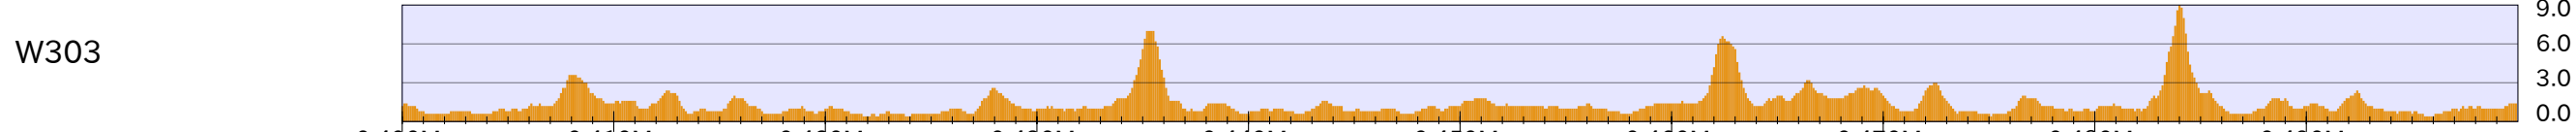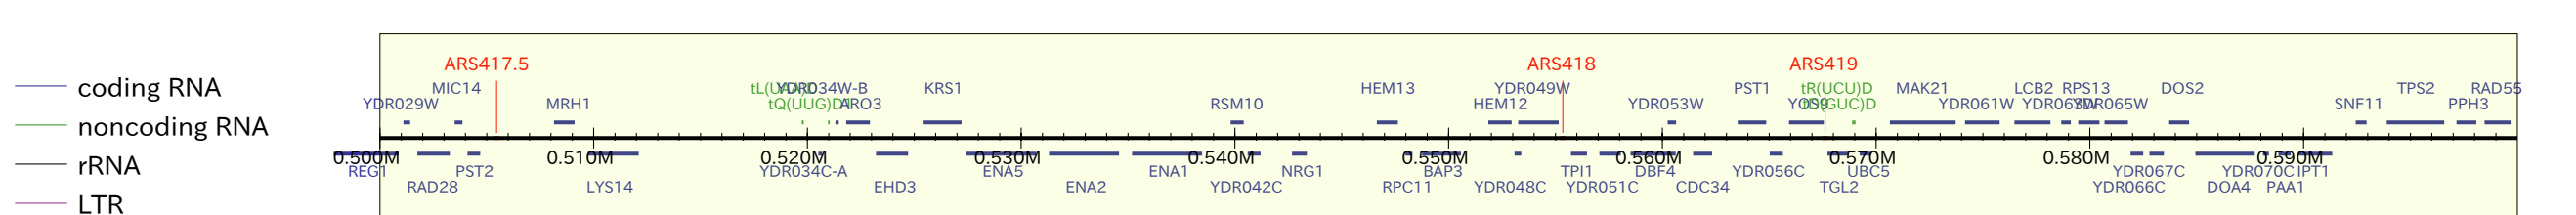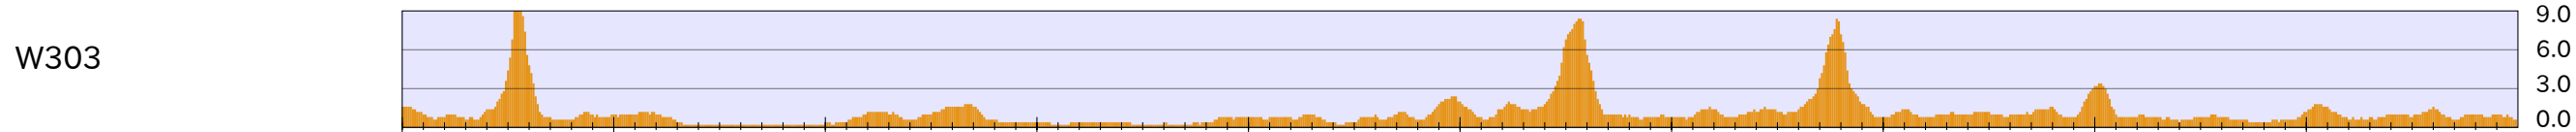



















chrIX

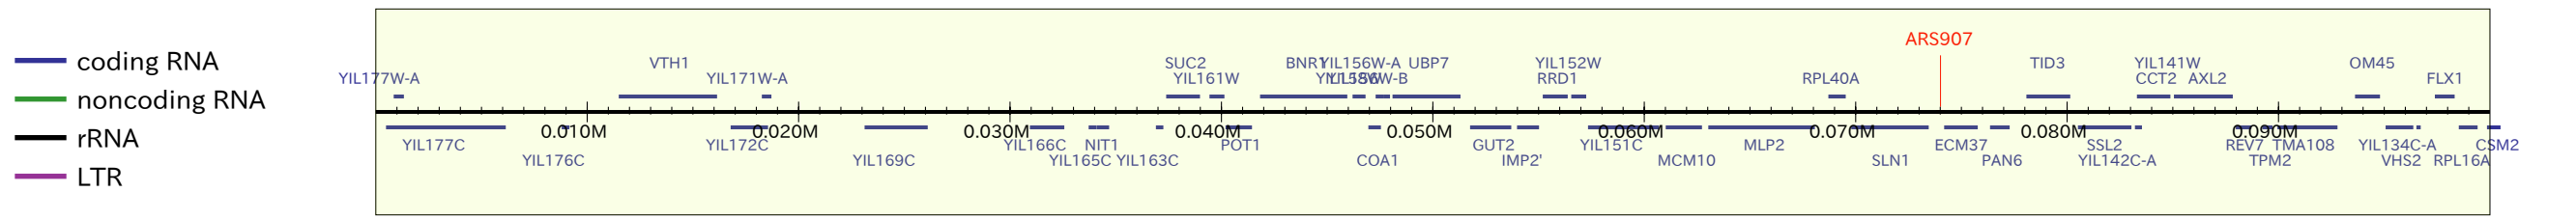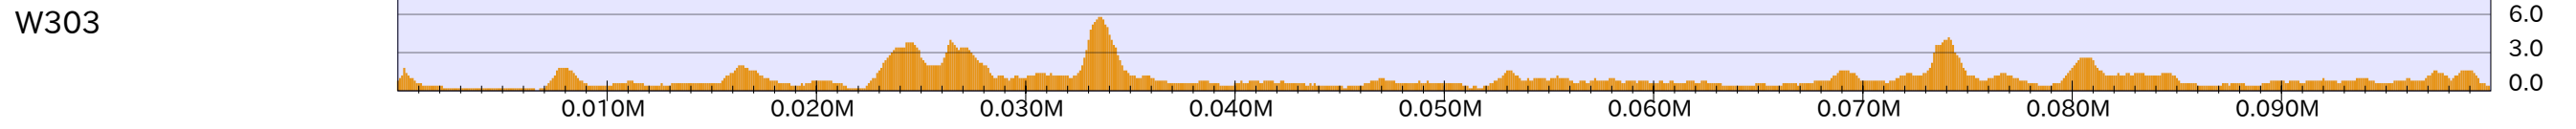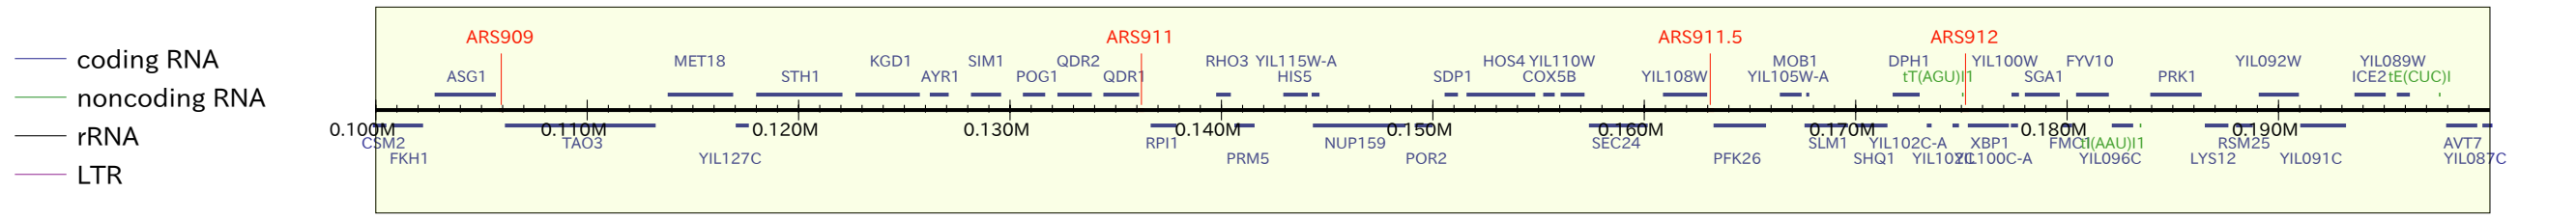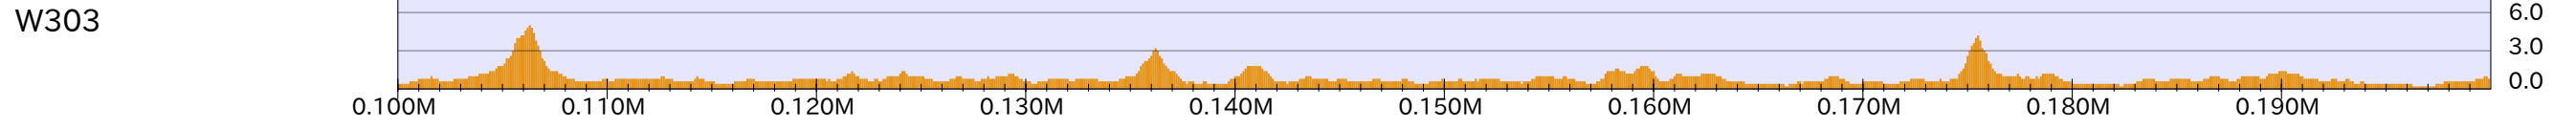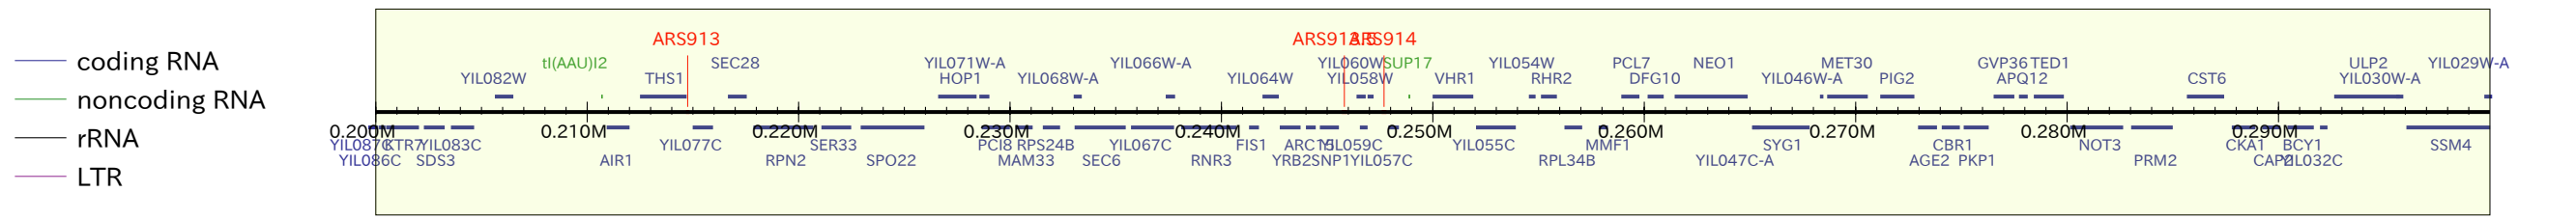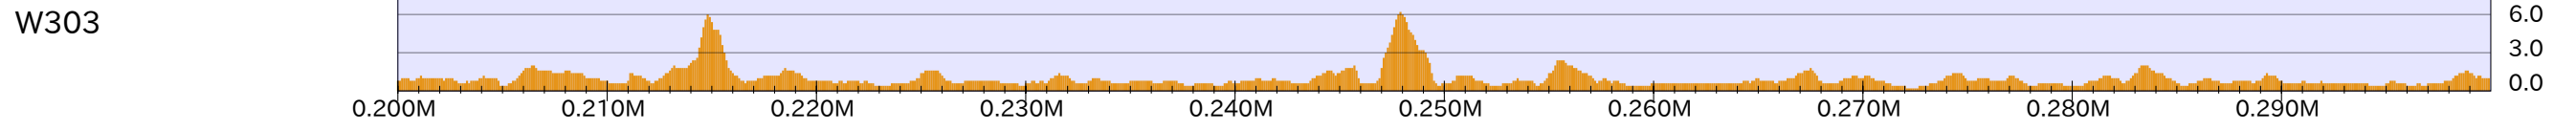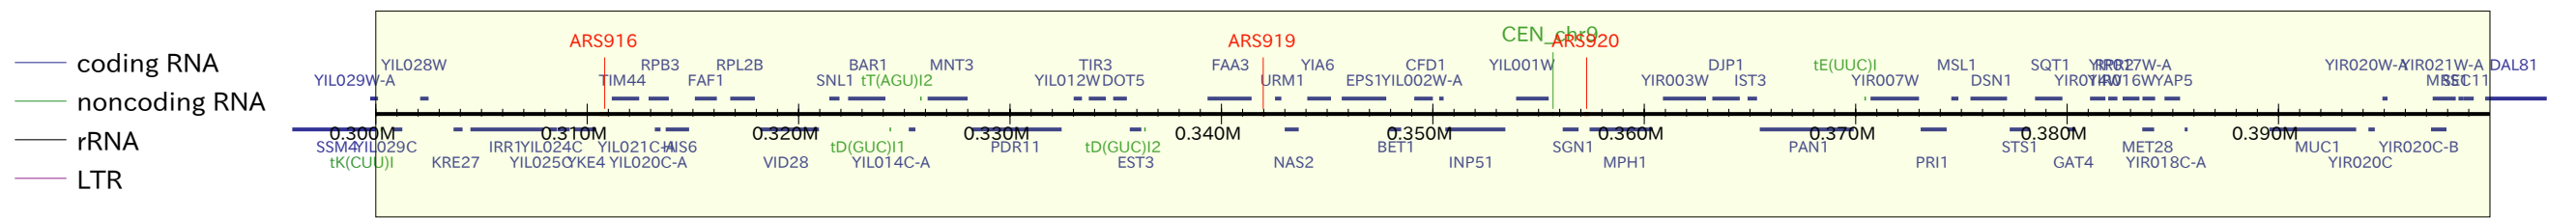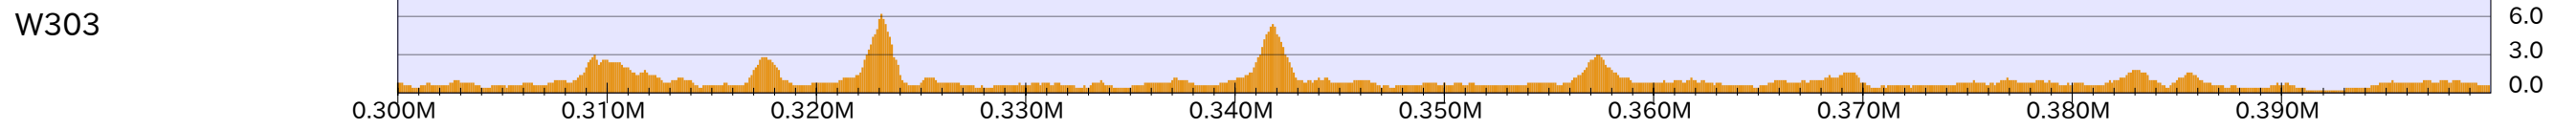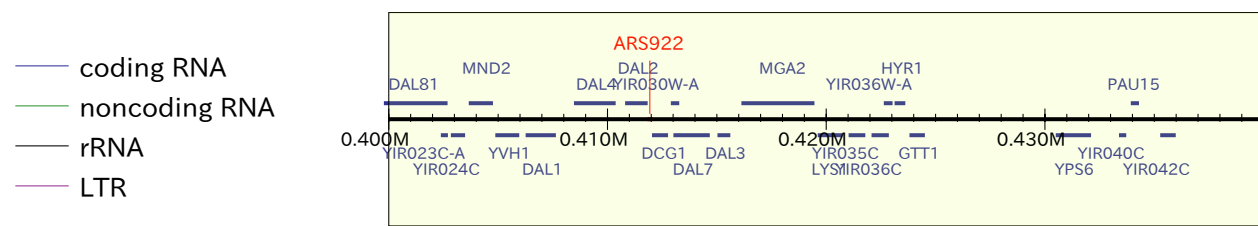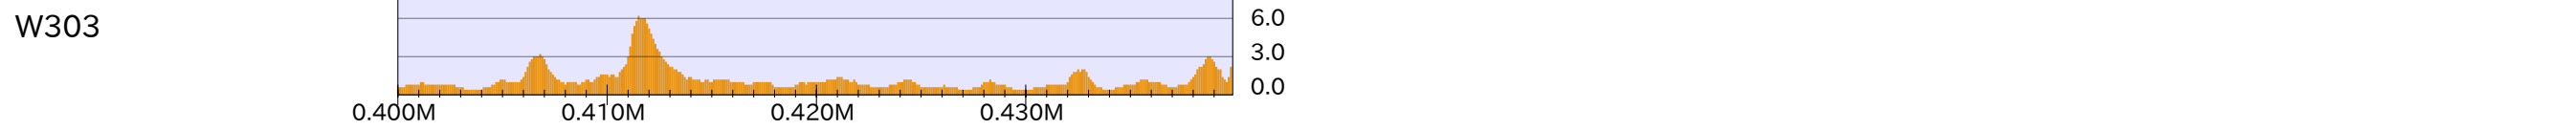



chrX\_2

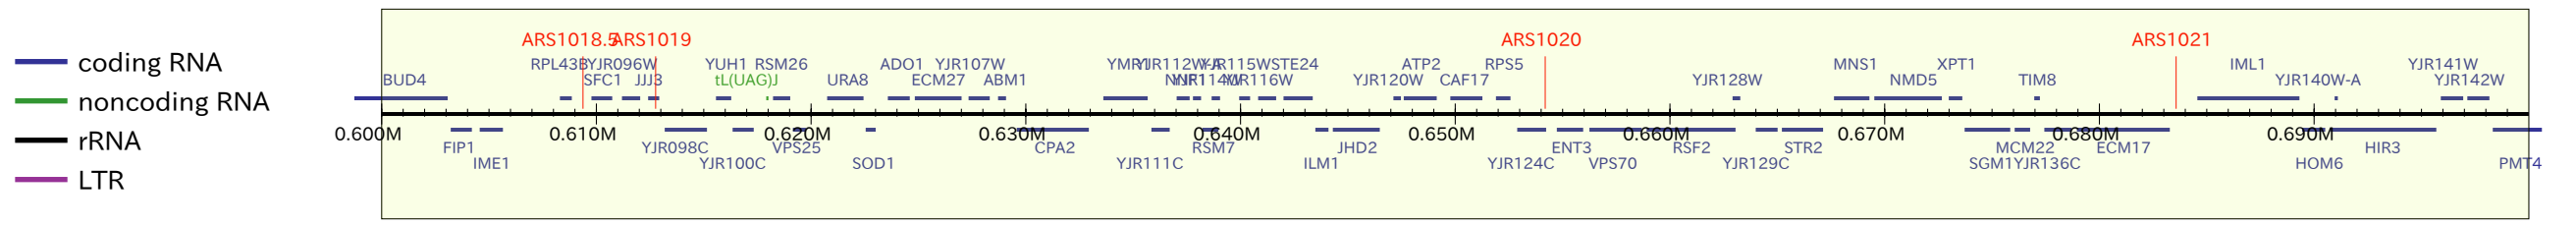

W303

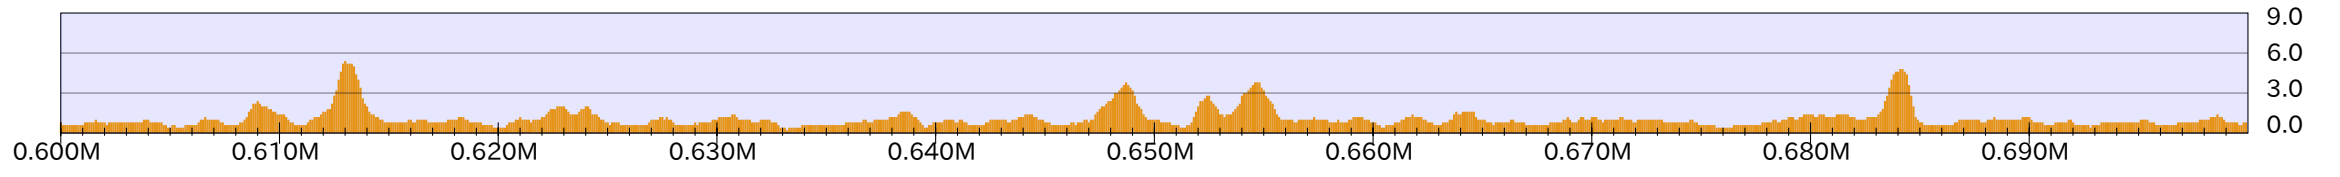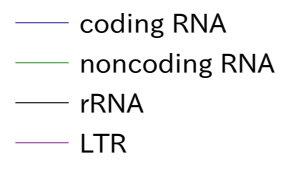

W303

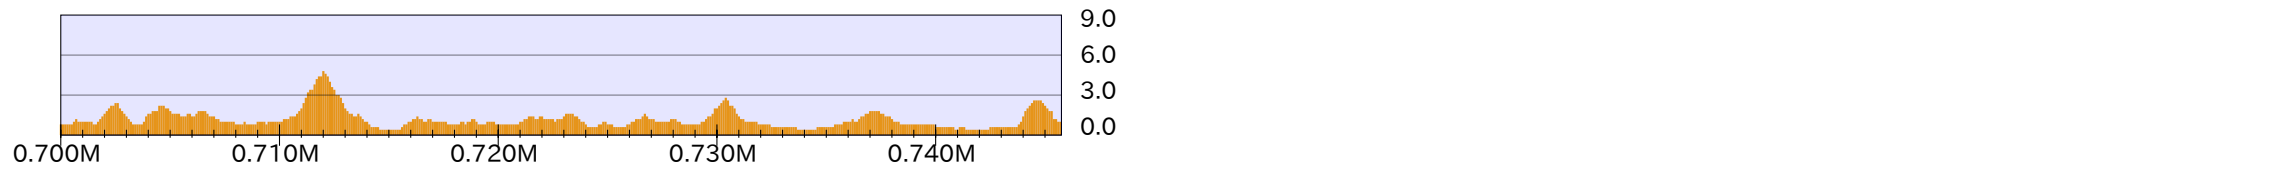





chrXI\_2

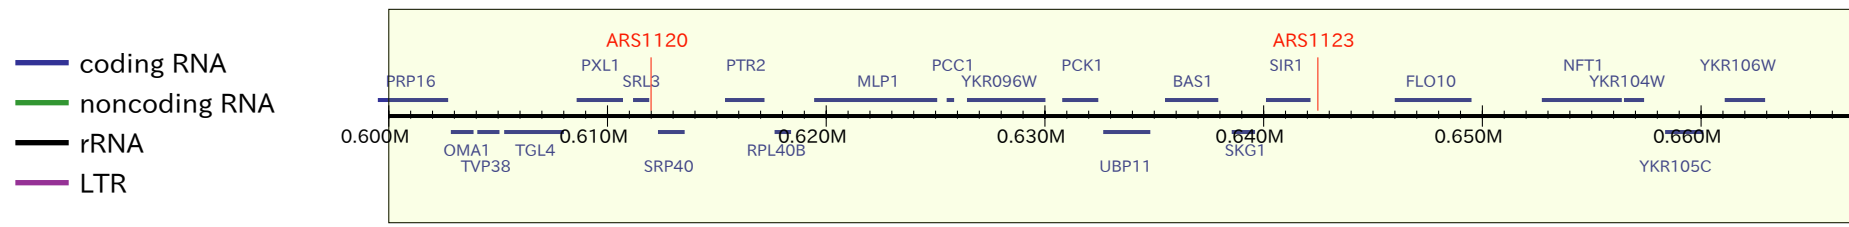

W303

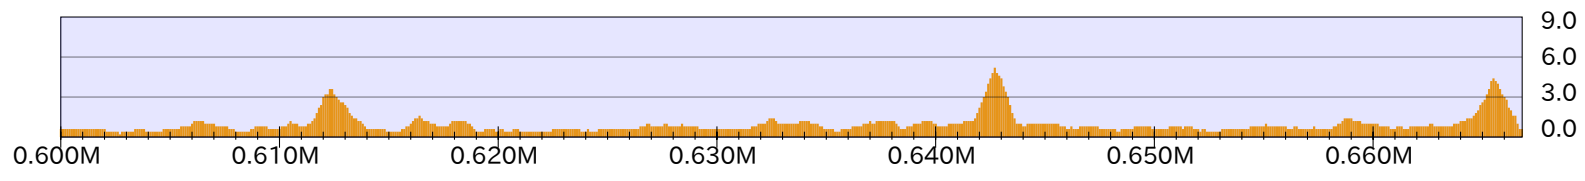









chrXIII\_2

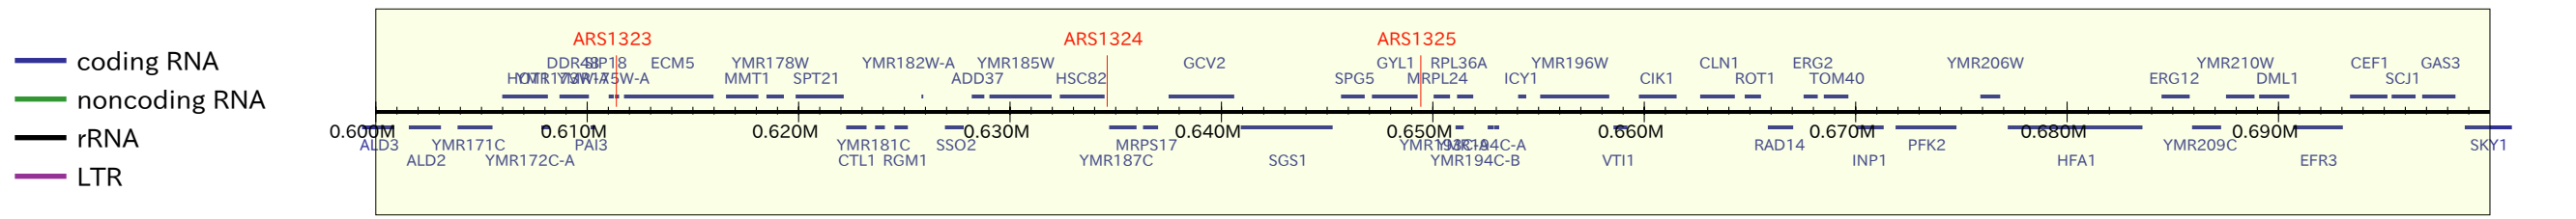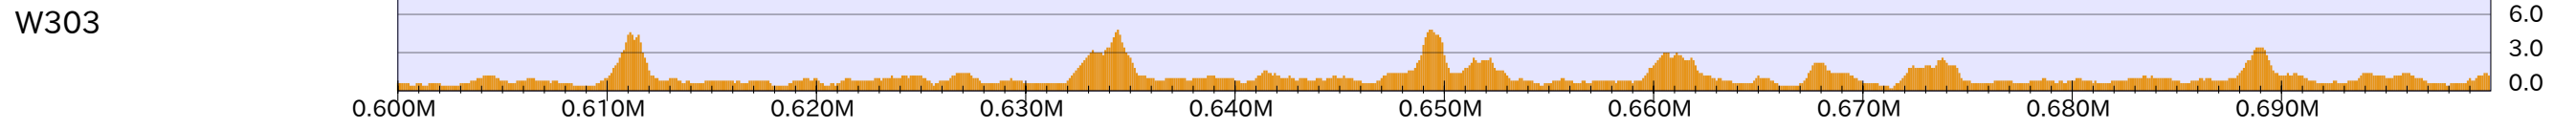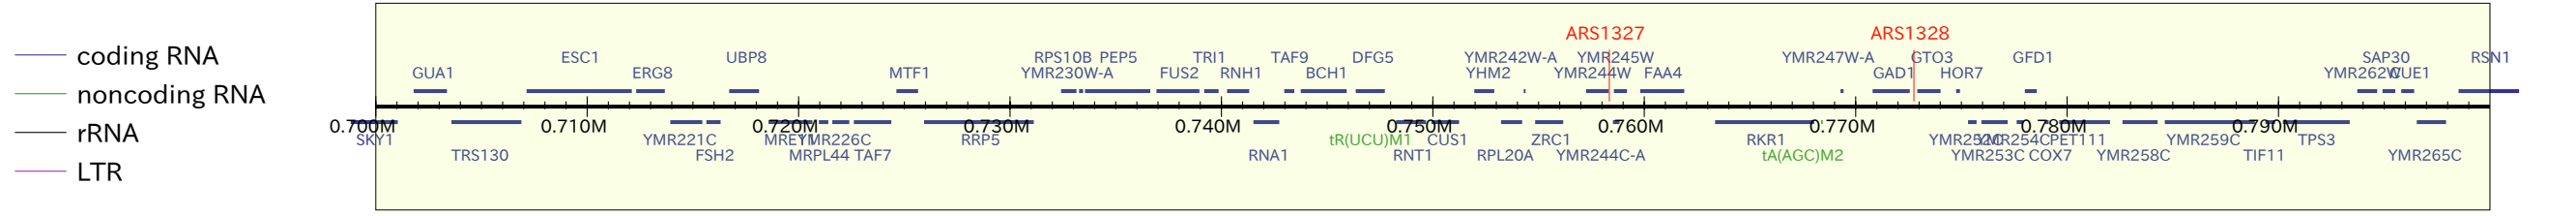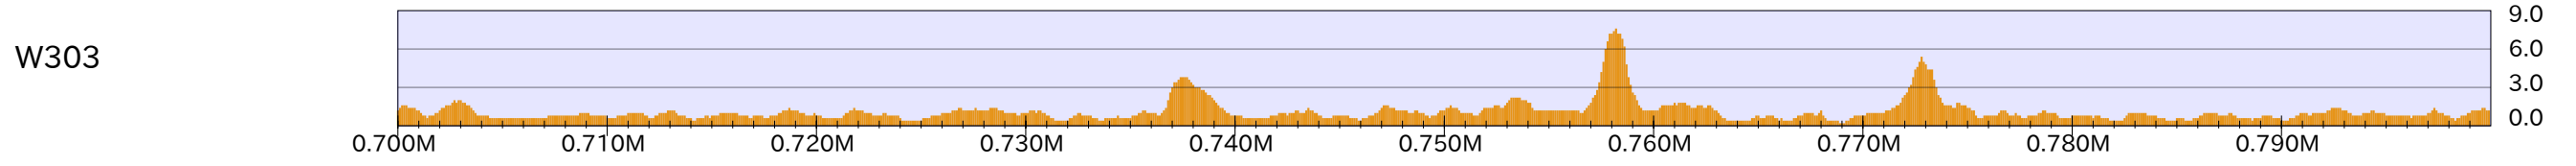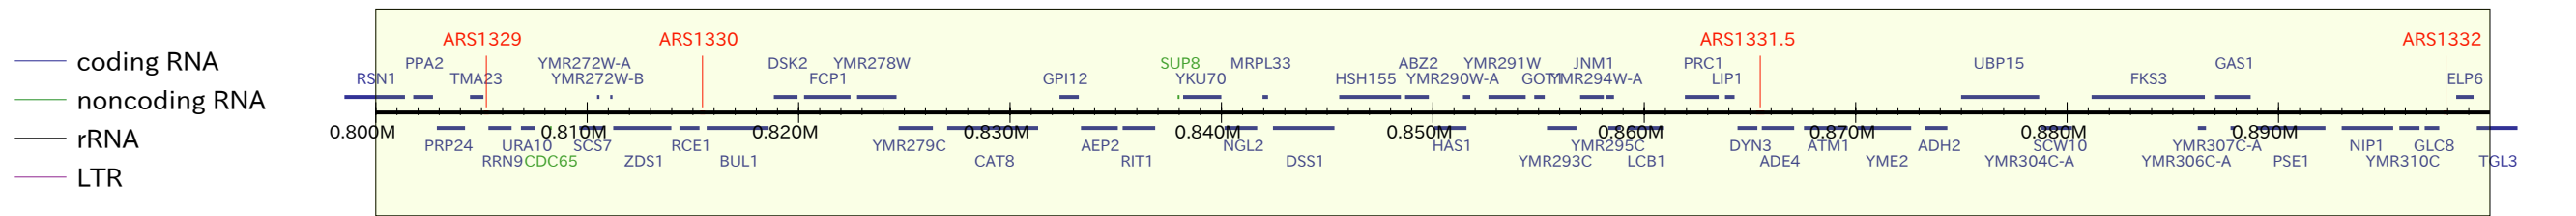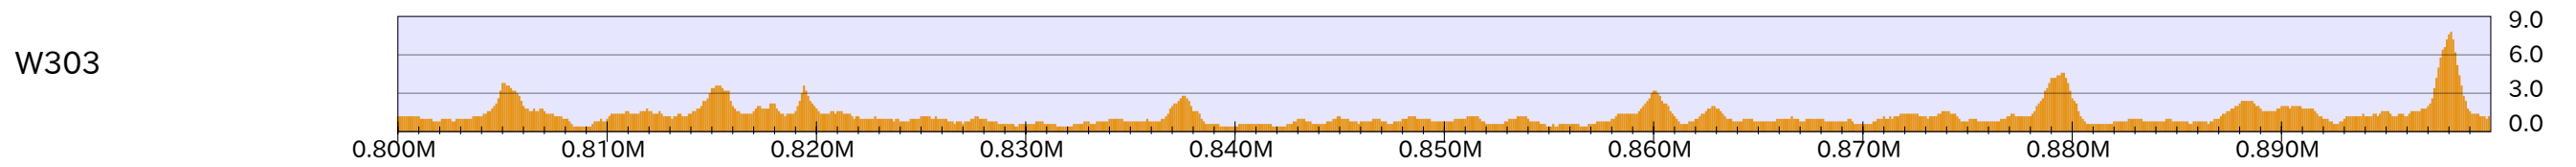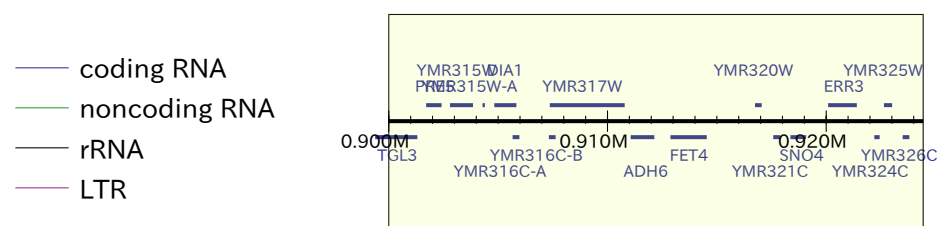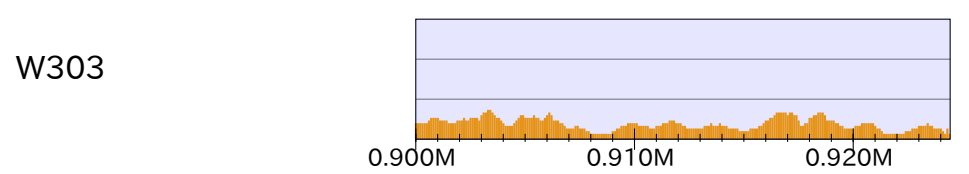

chrXIV\_1

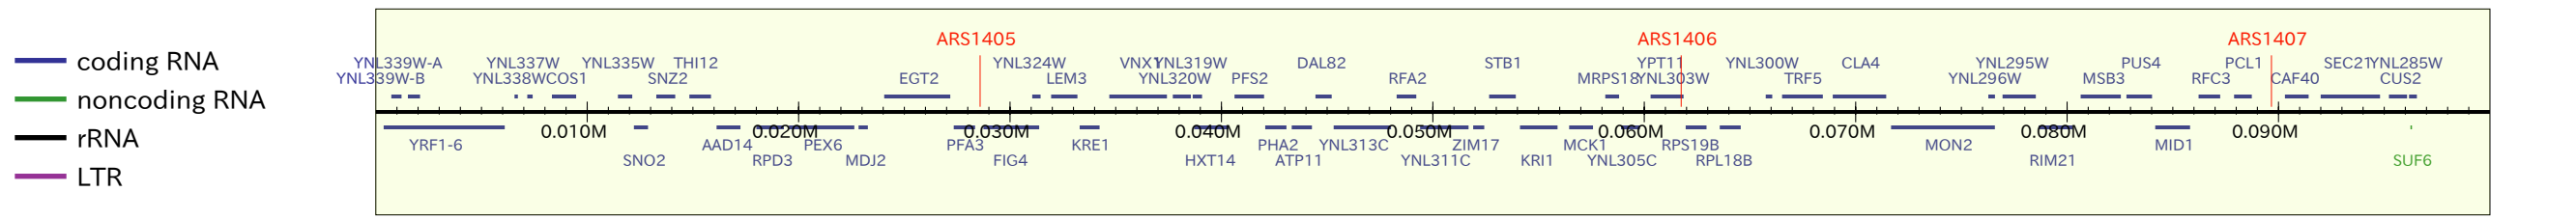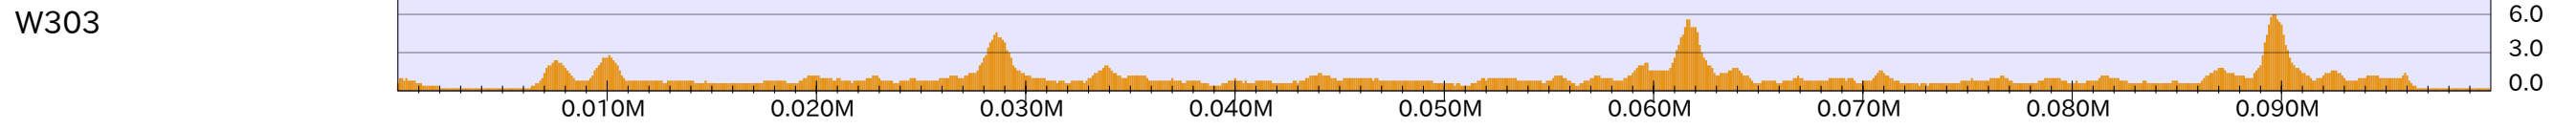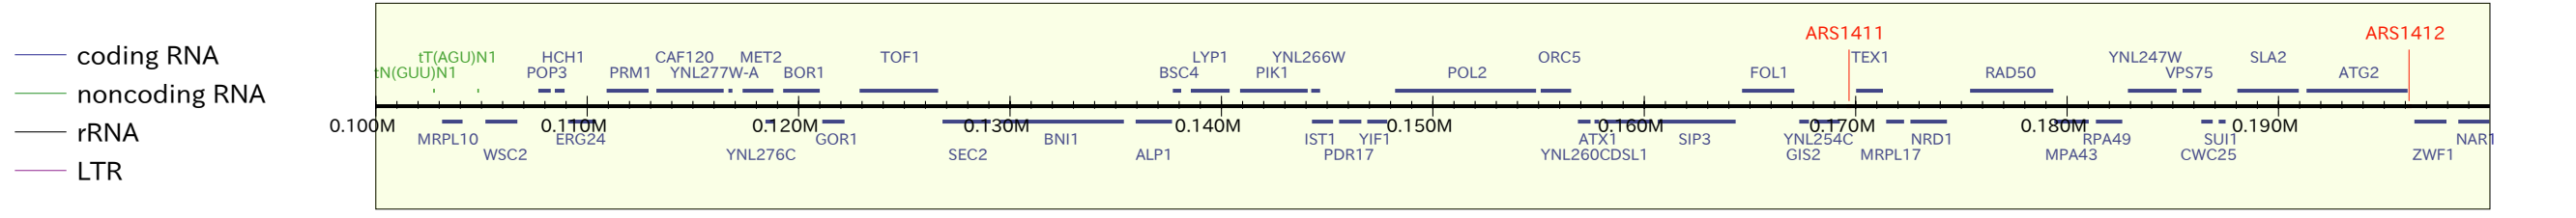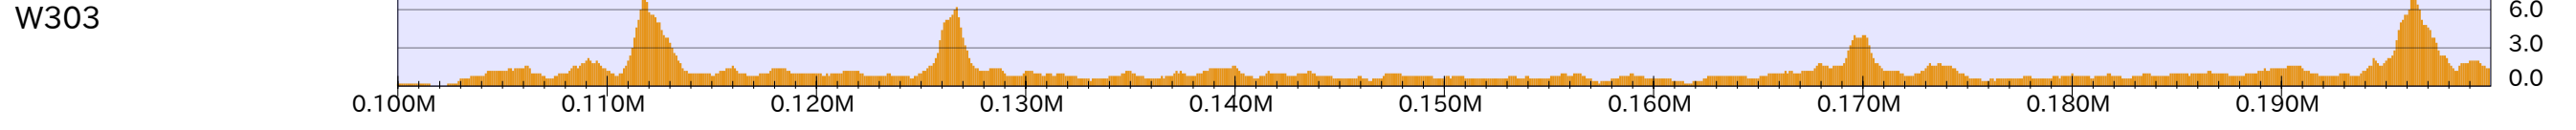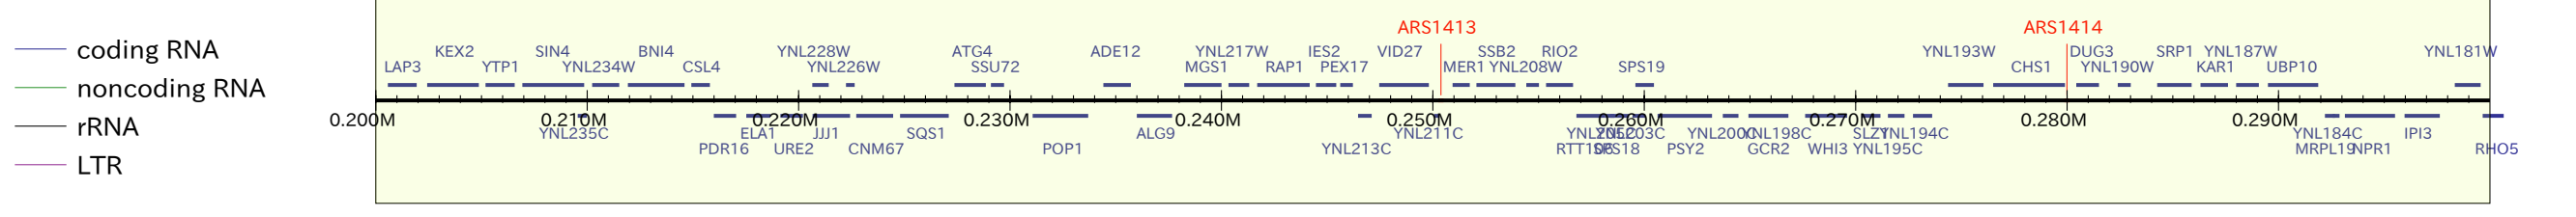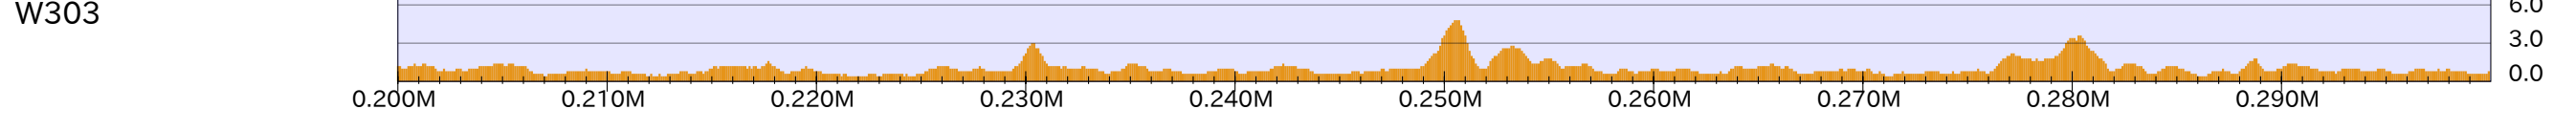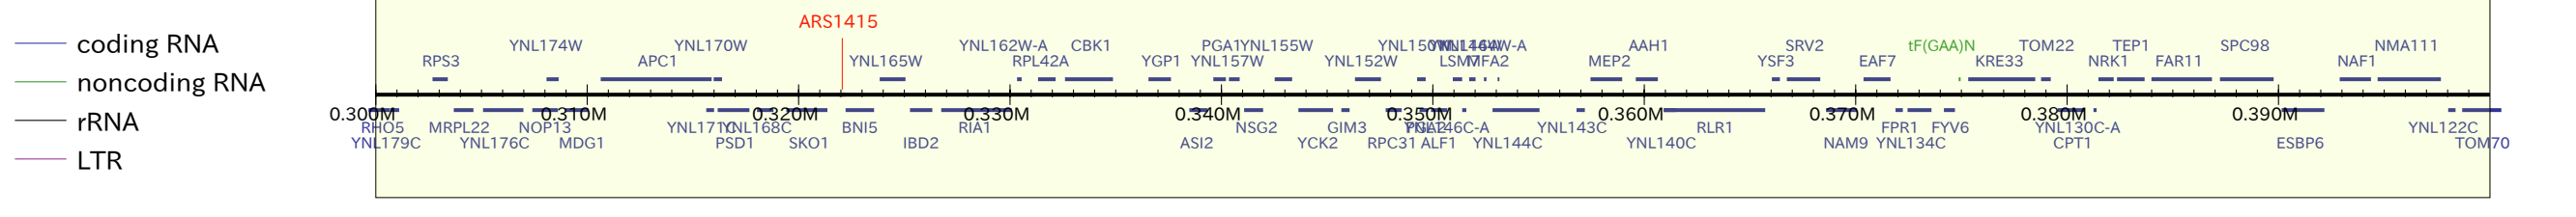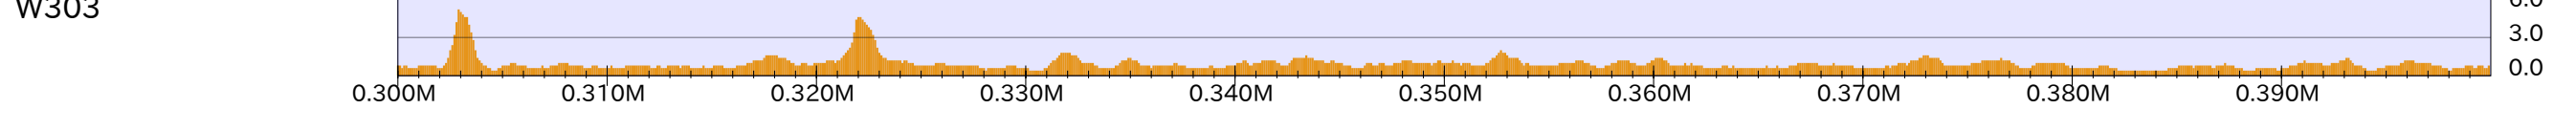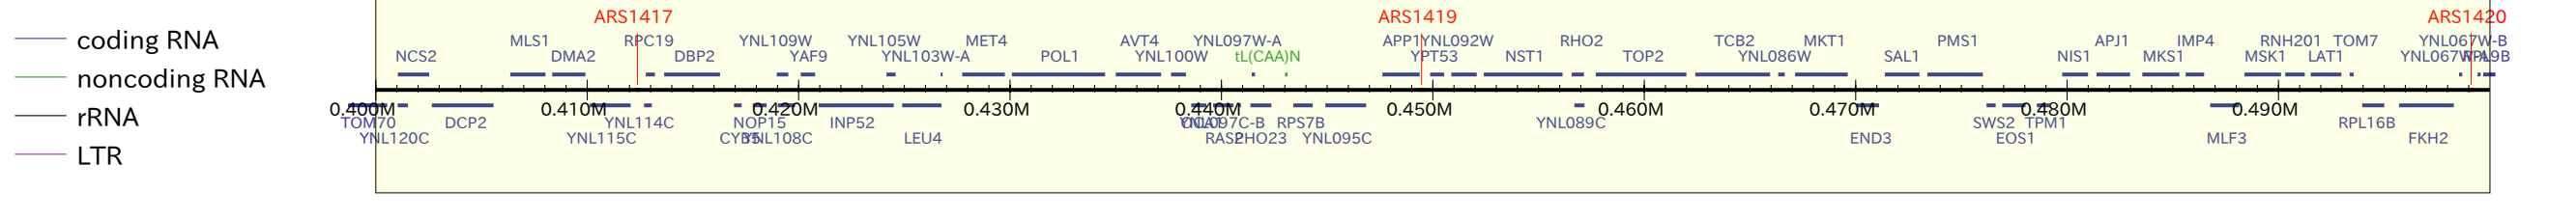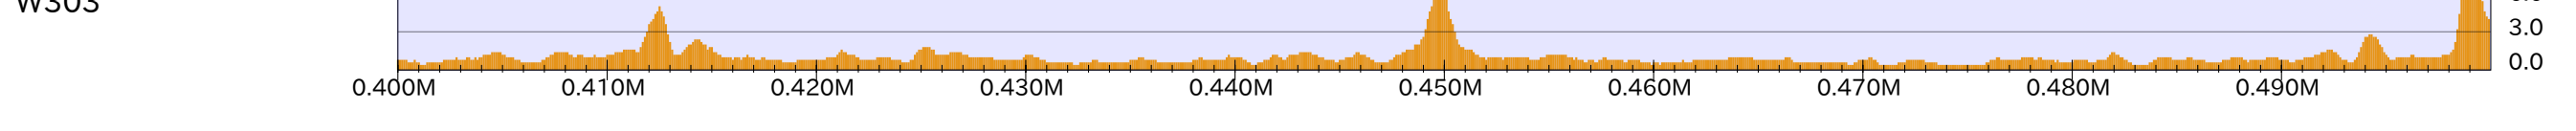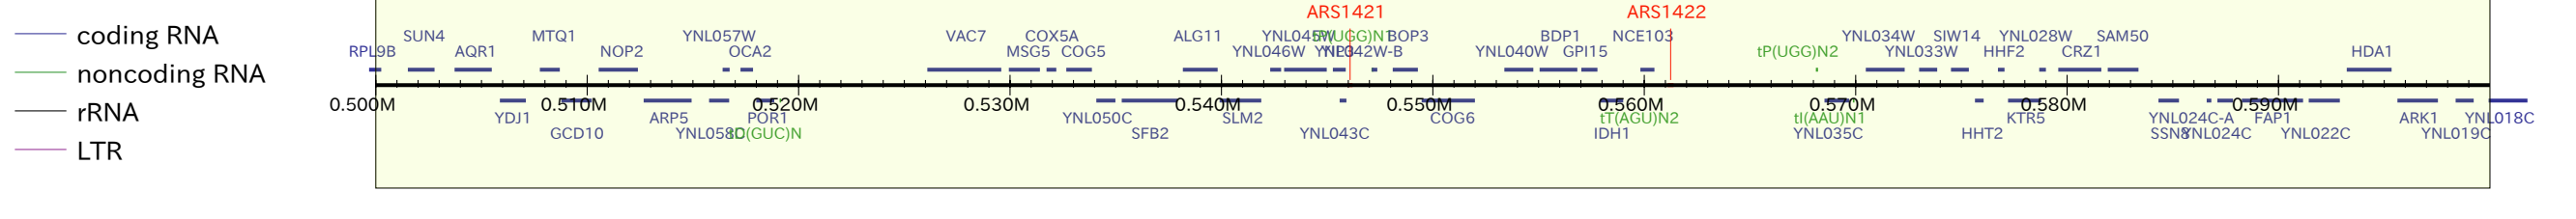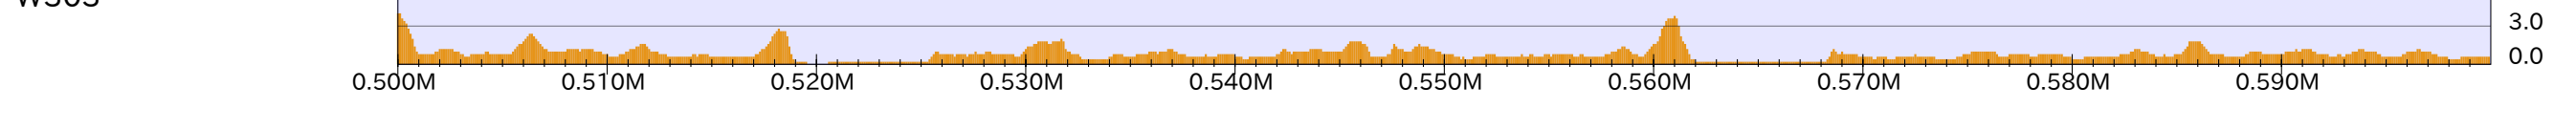

chrXIV\_2

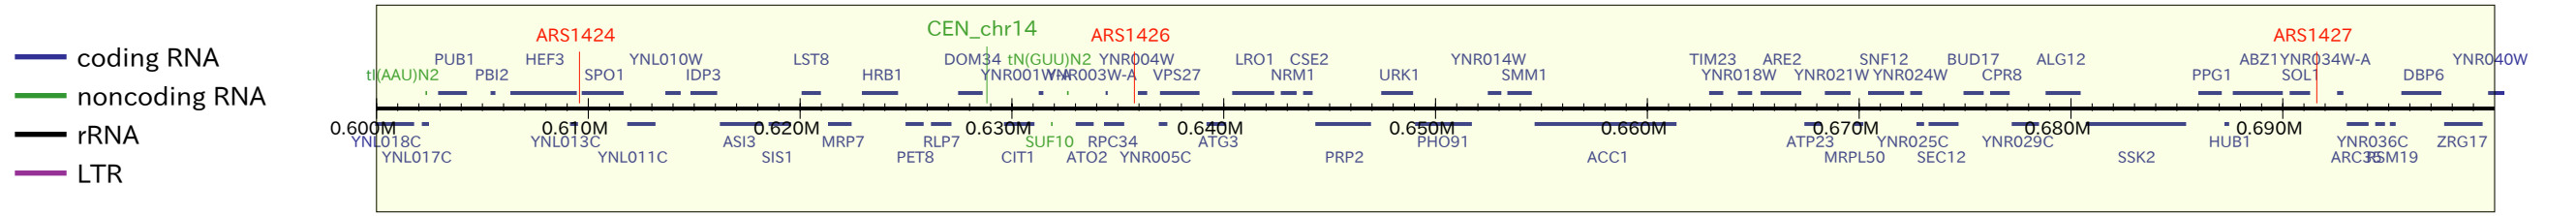

W303

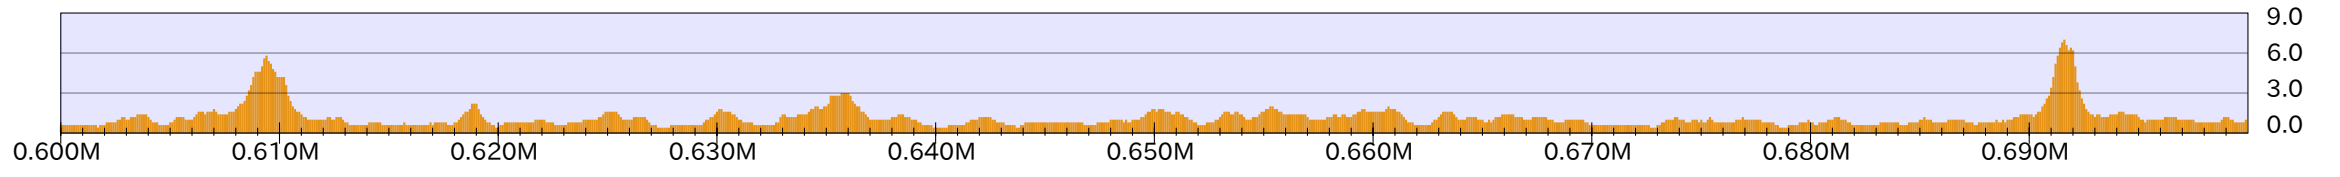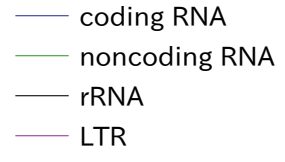

W303

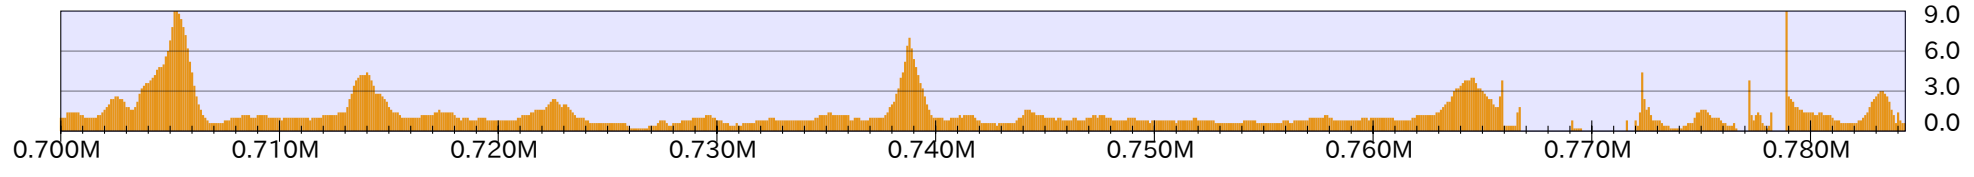



chrXV\_1

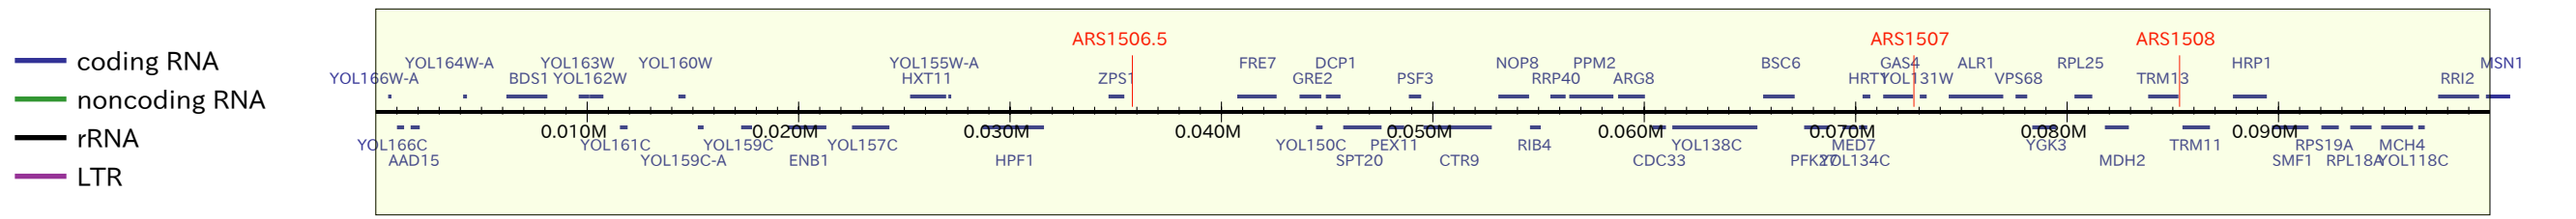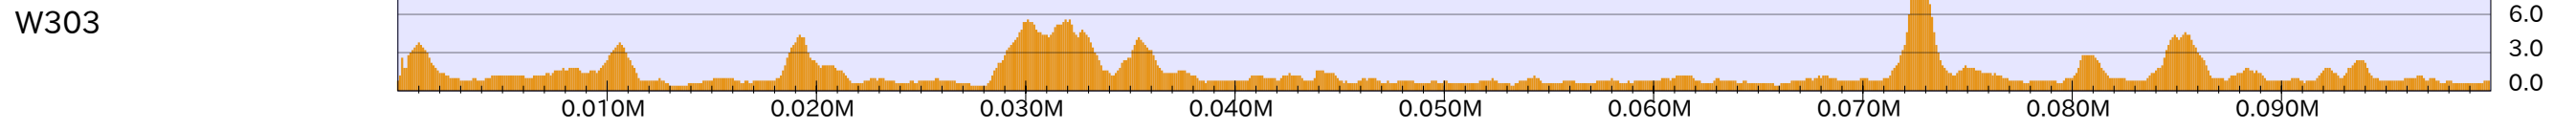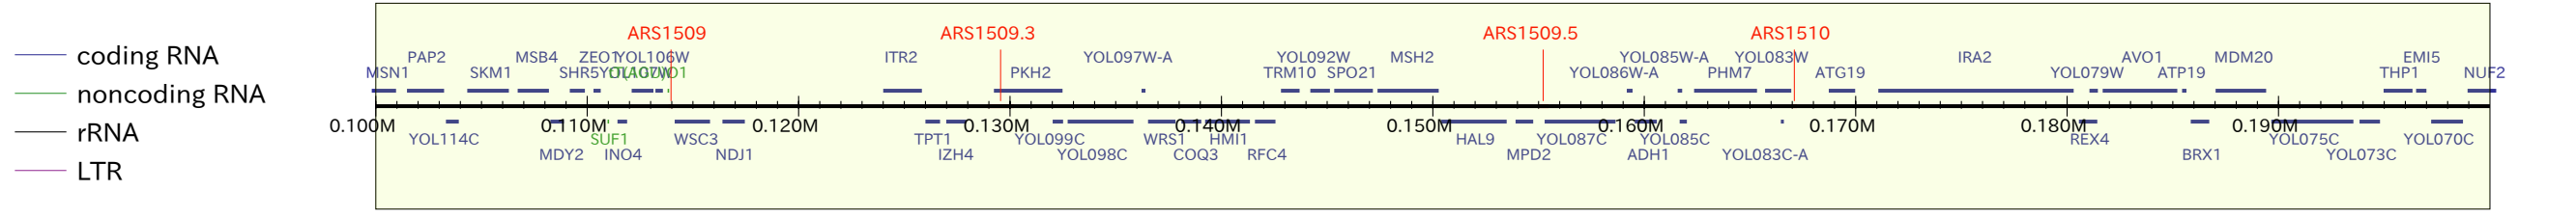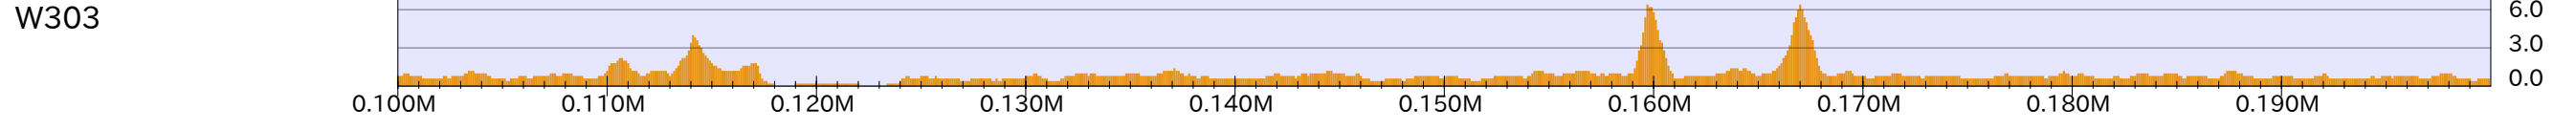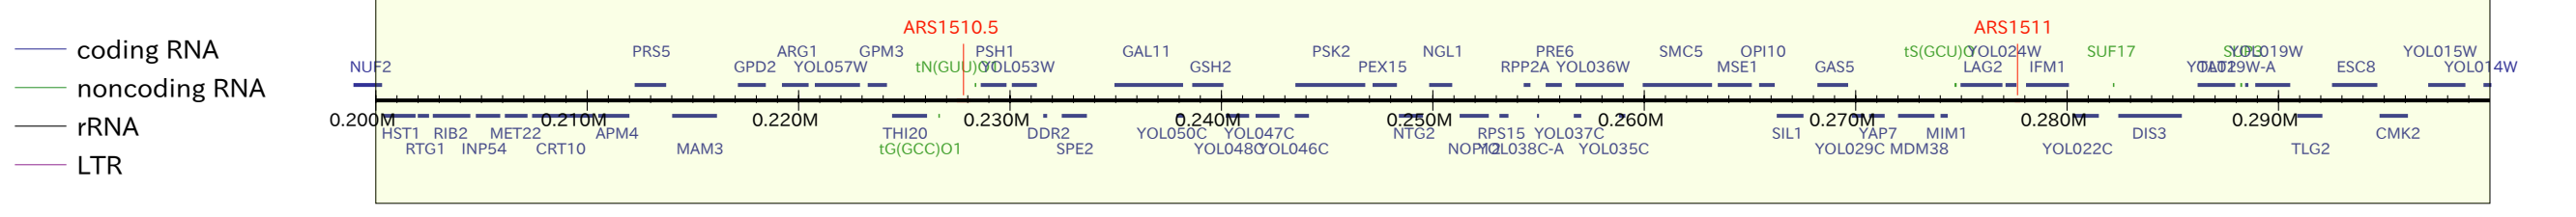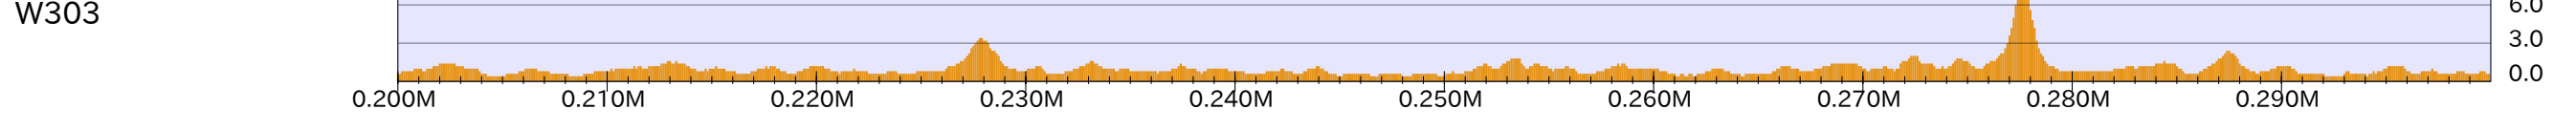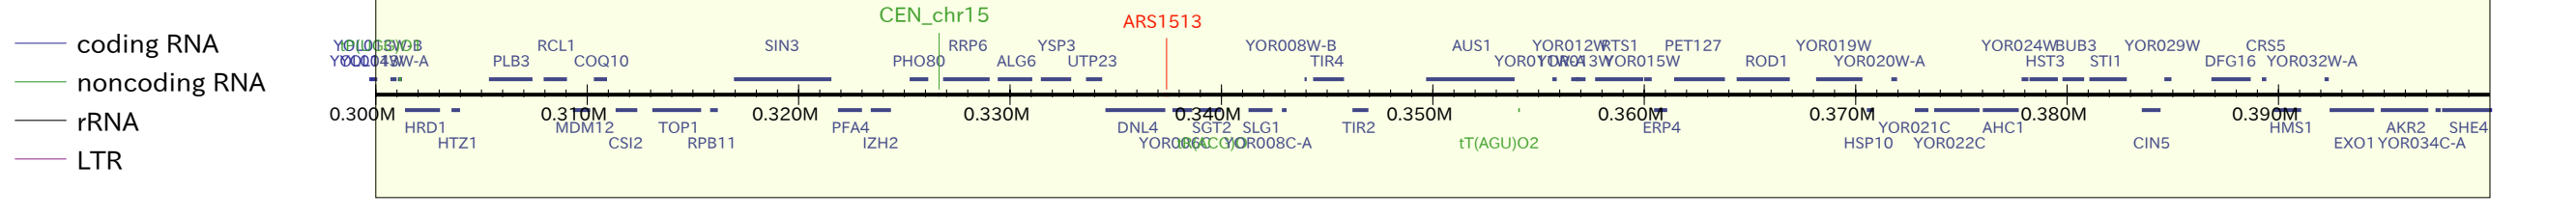

chrXV\_2

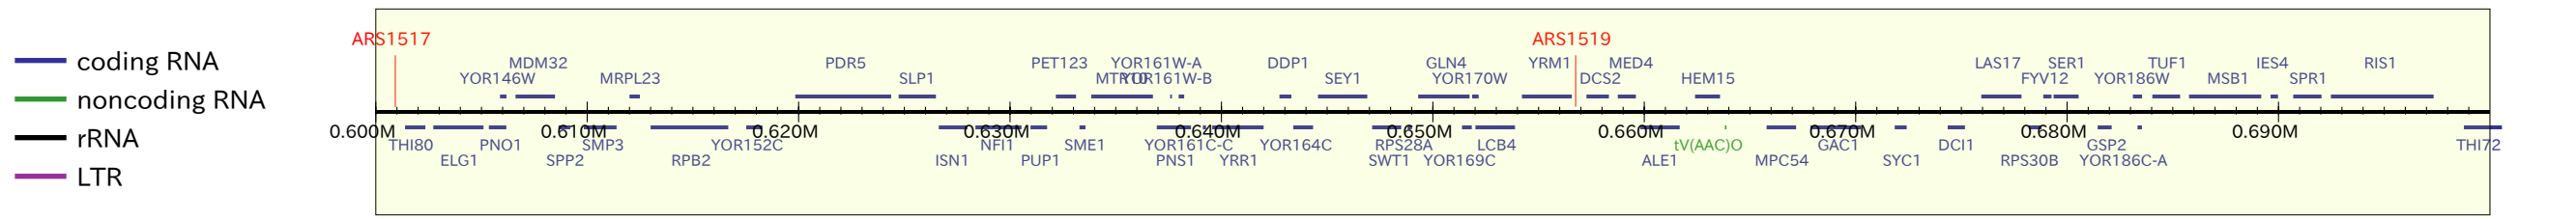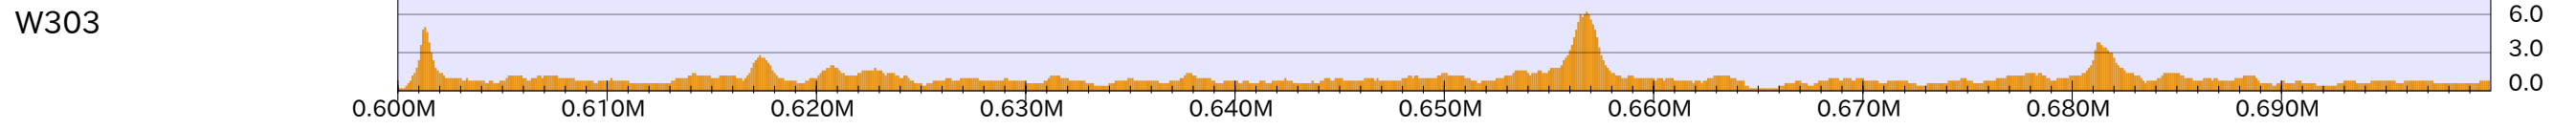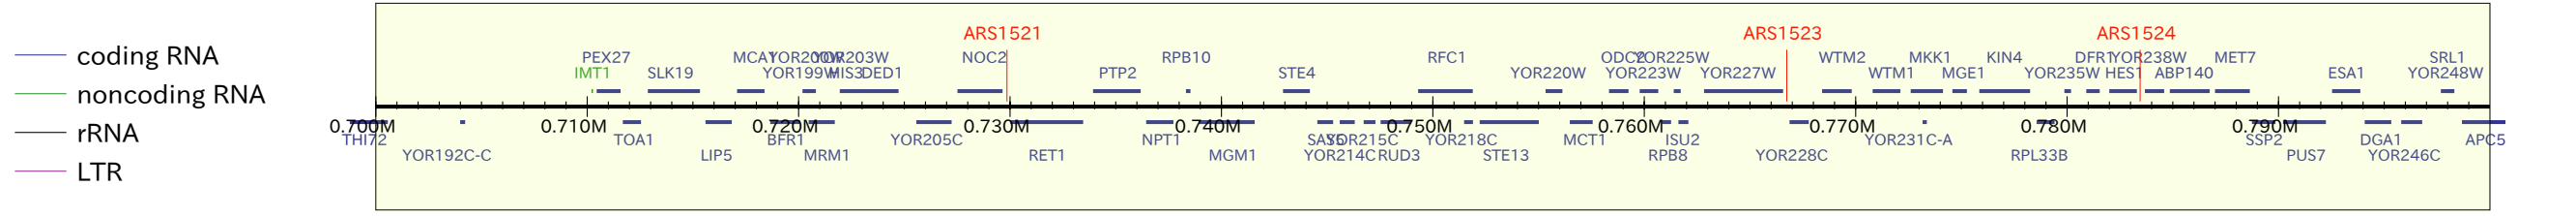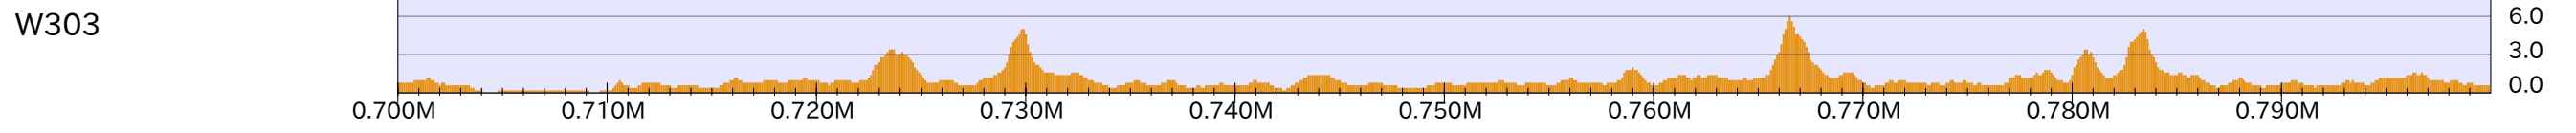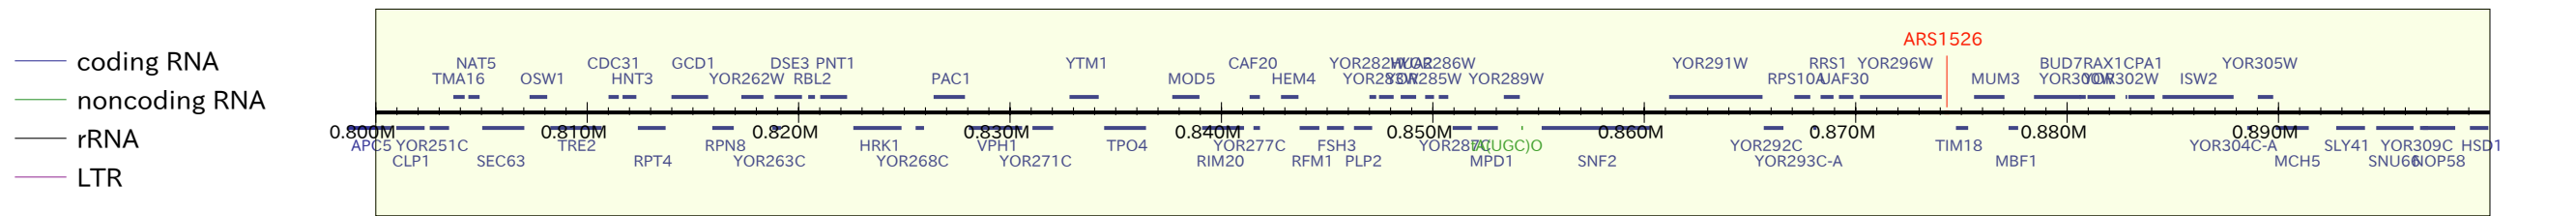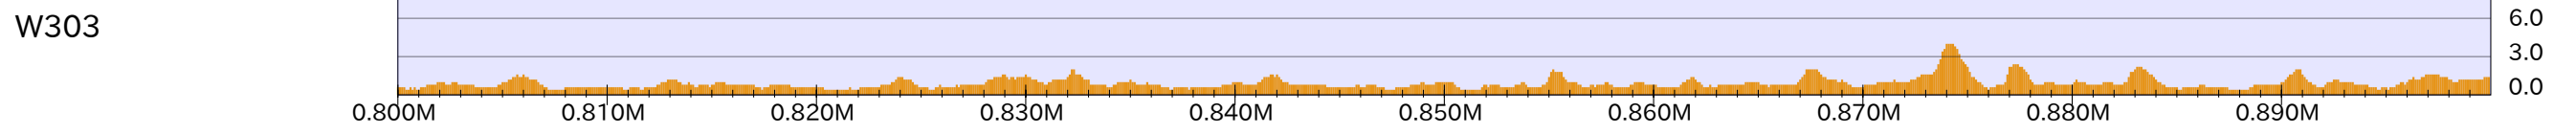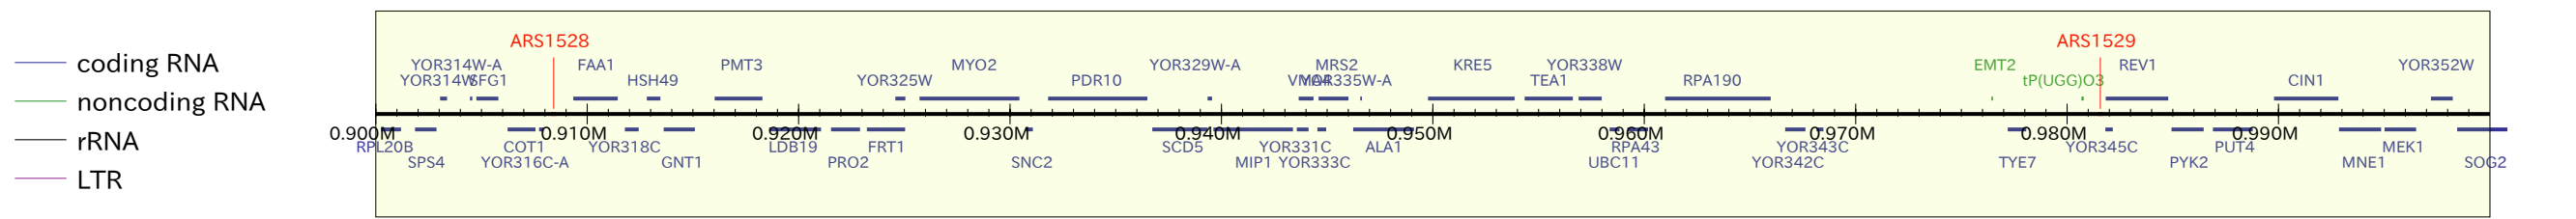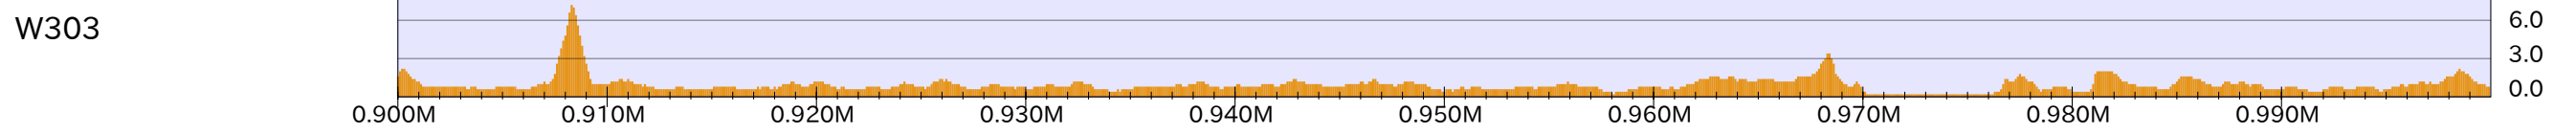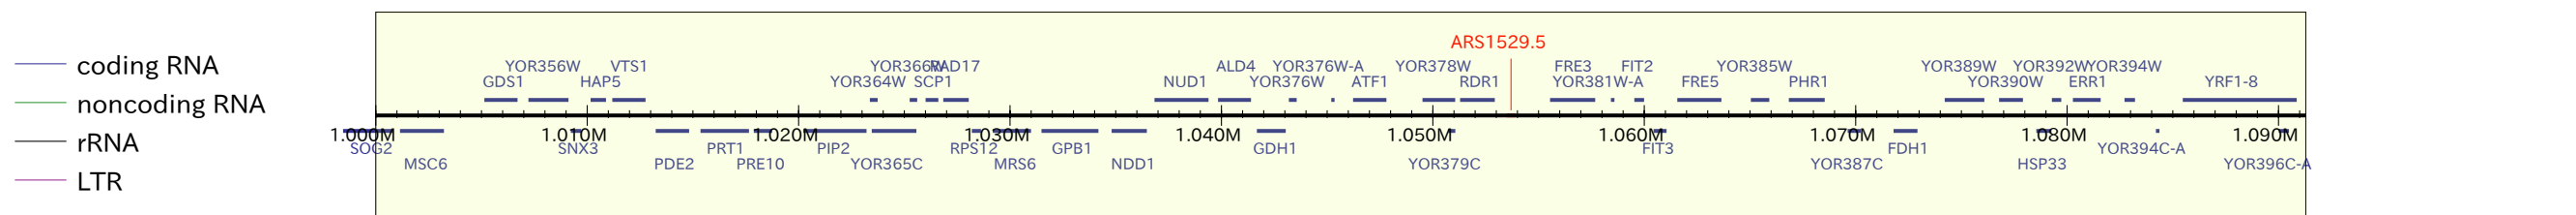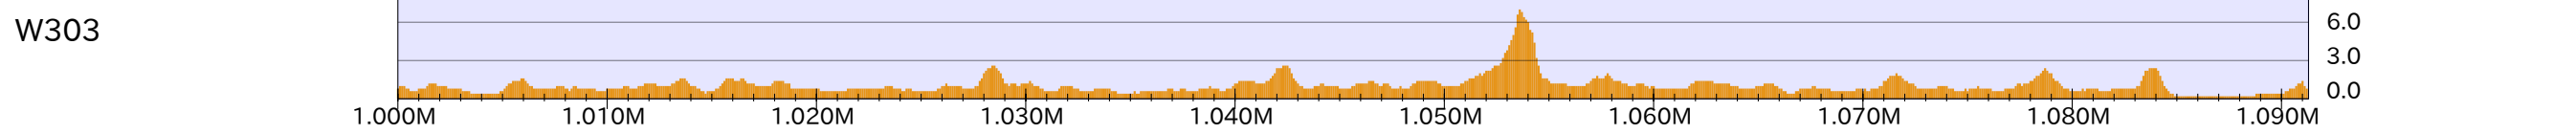









chr2micron

- coding RNA
- noncoding RNA
- rRNA
- LTR

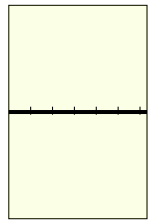

W303

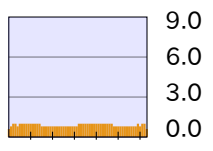

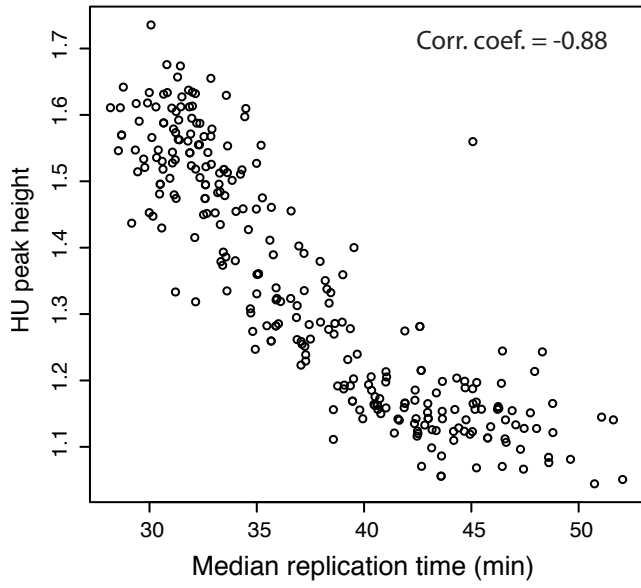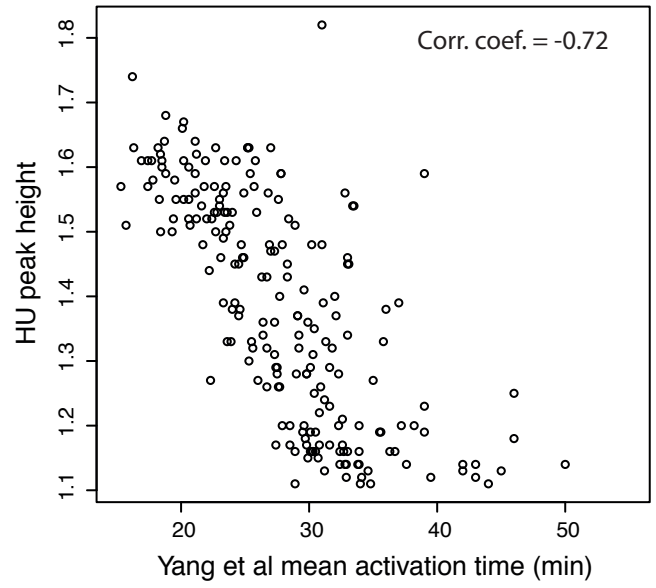

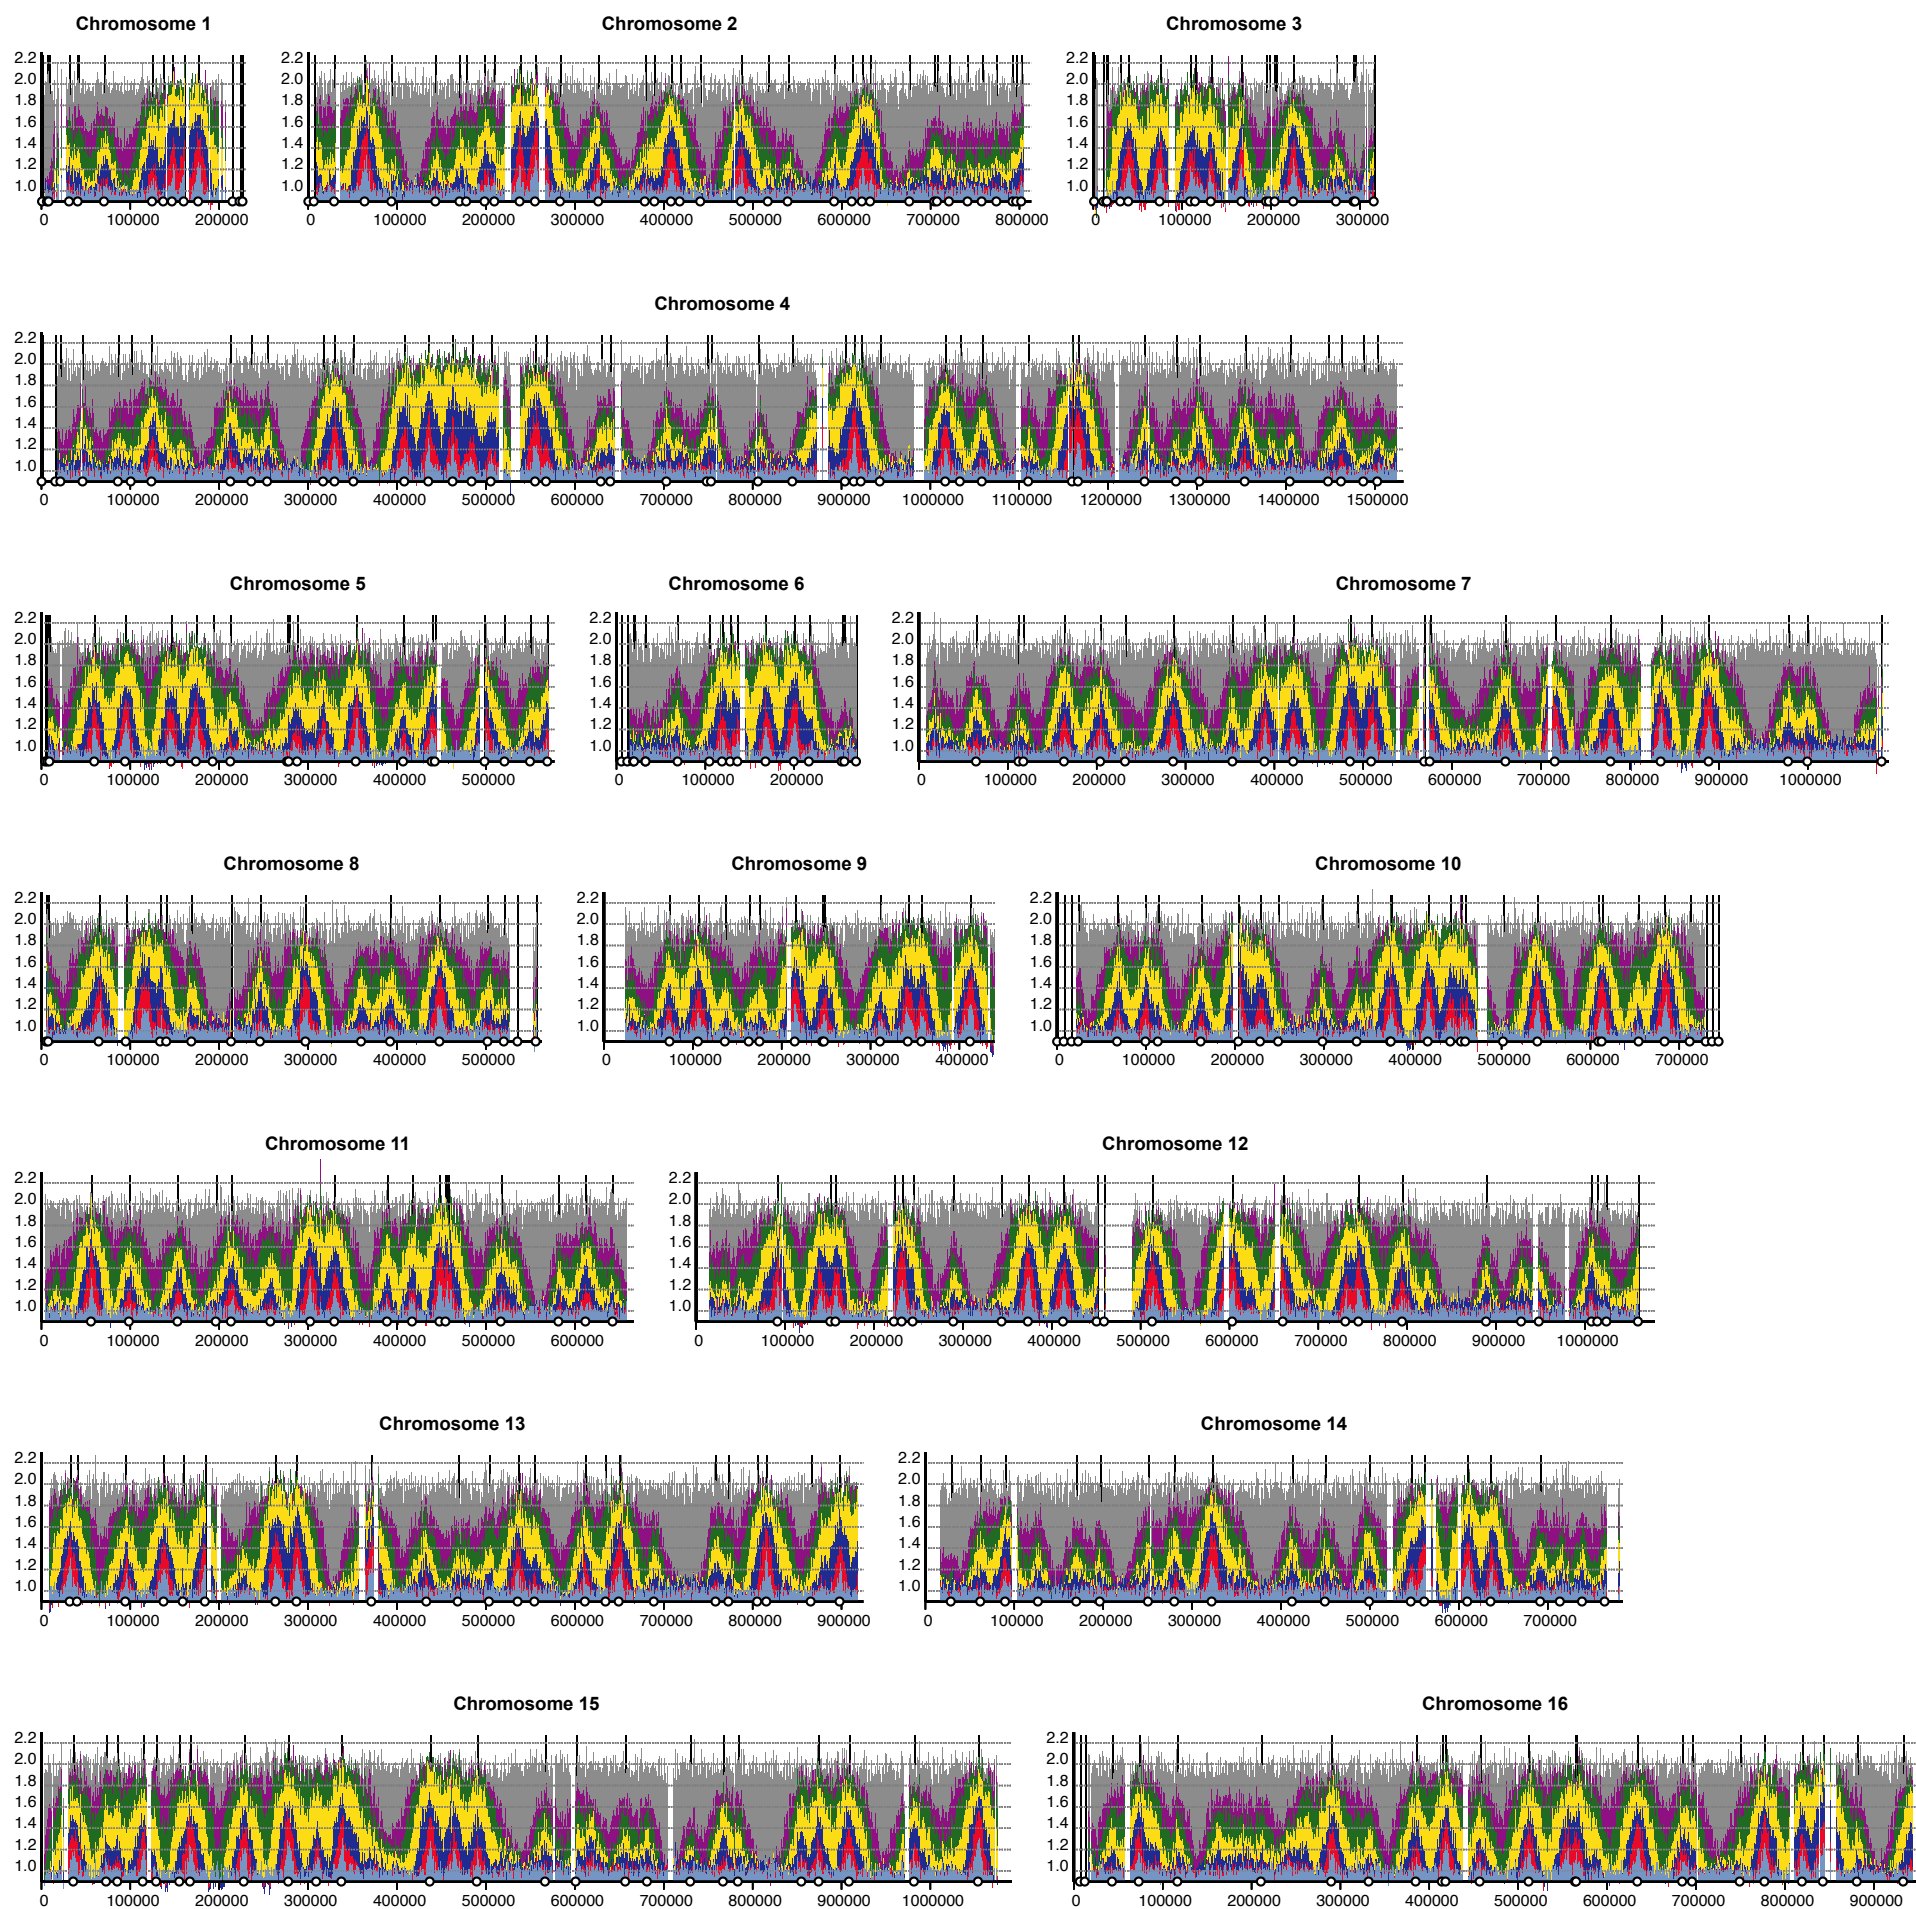

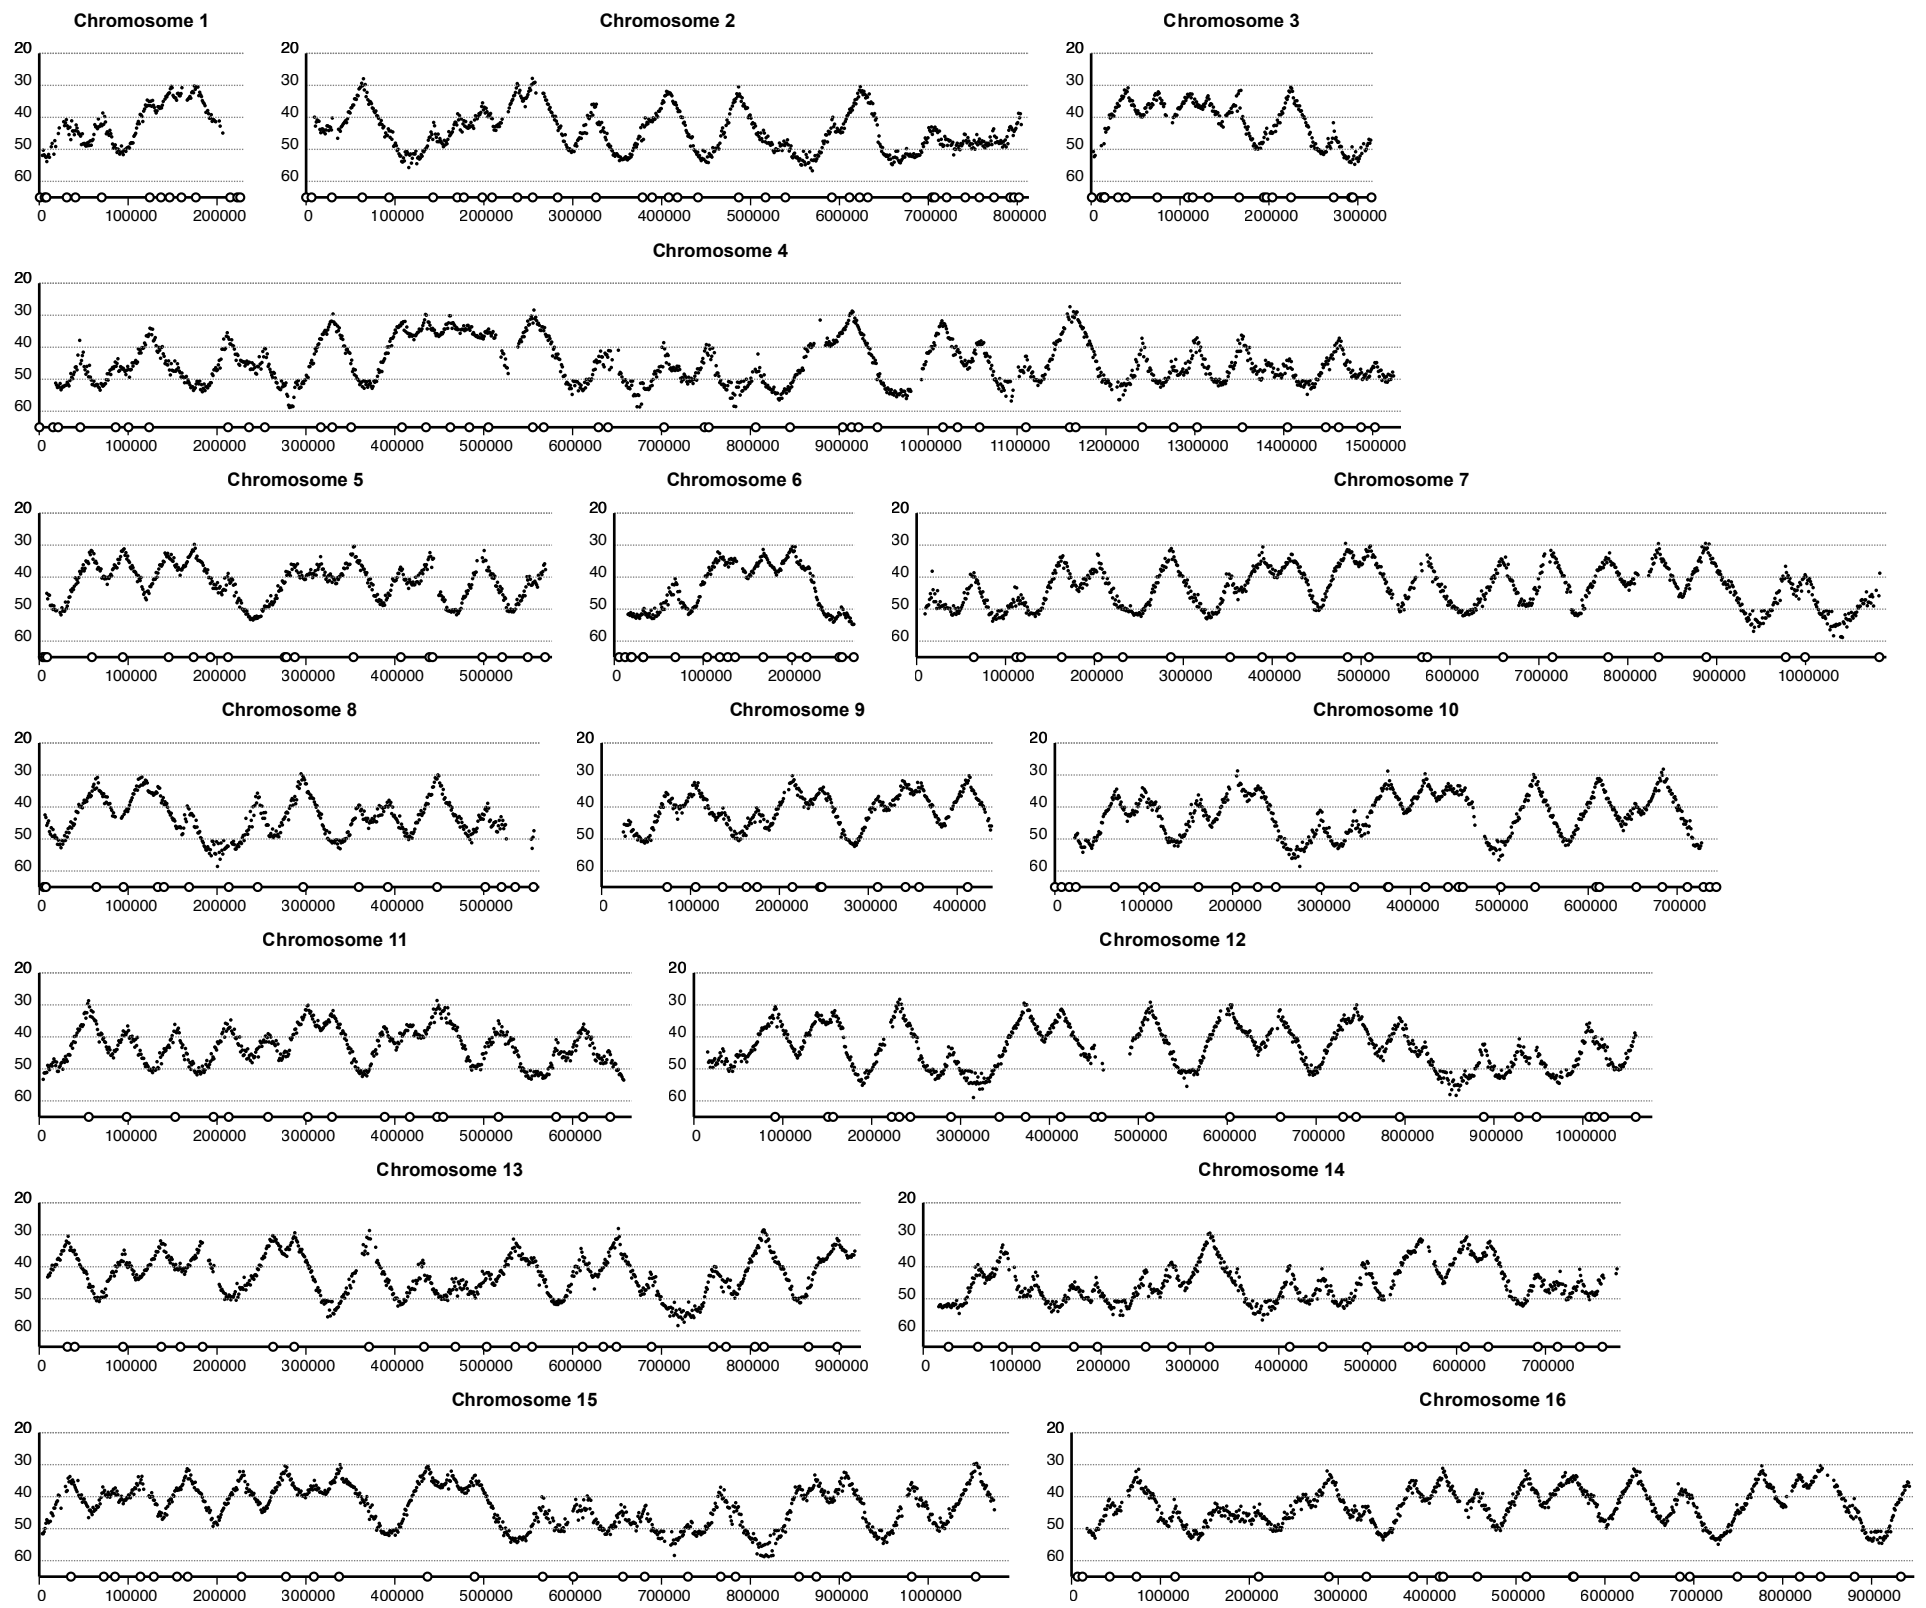

Müller, Hawkins, et al. Figure S6

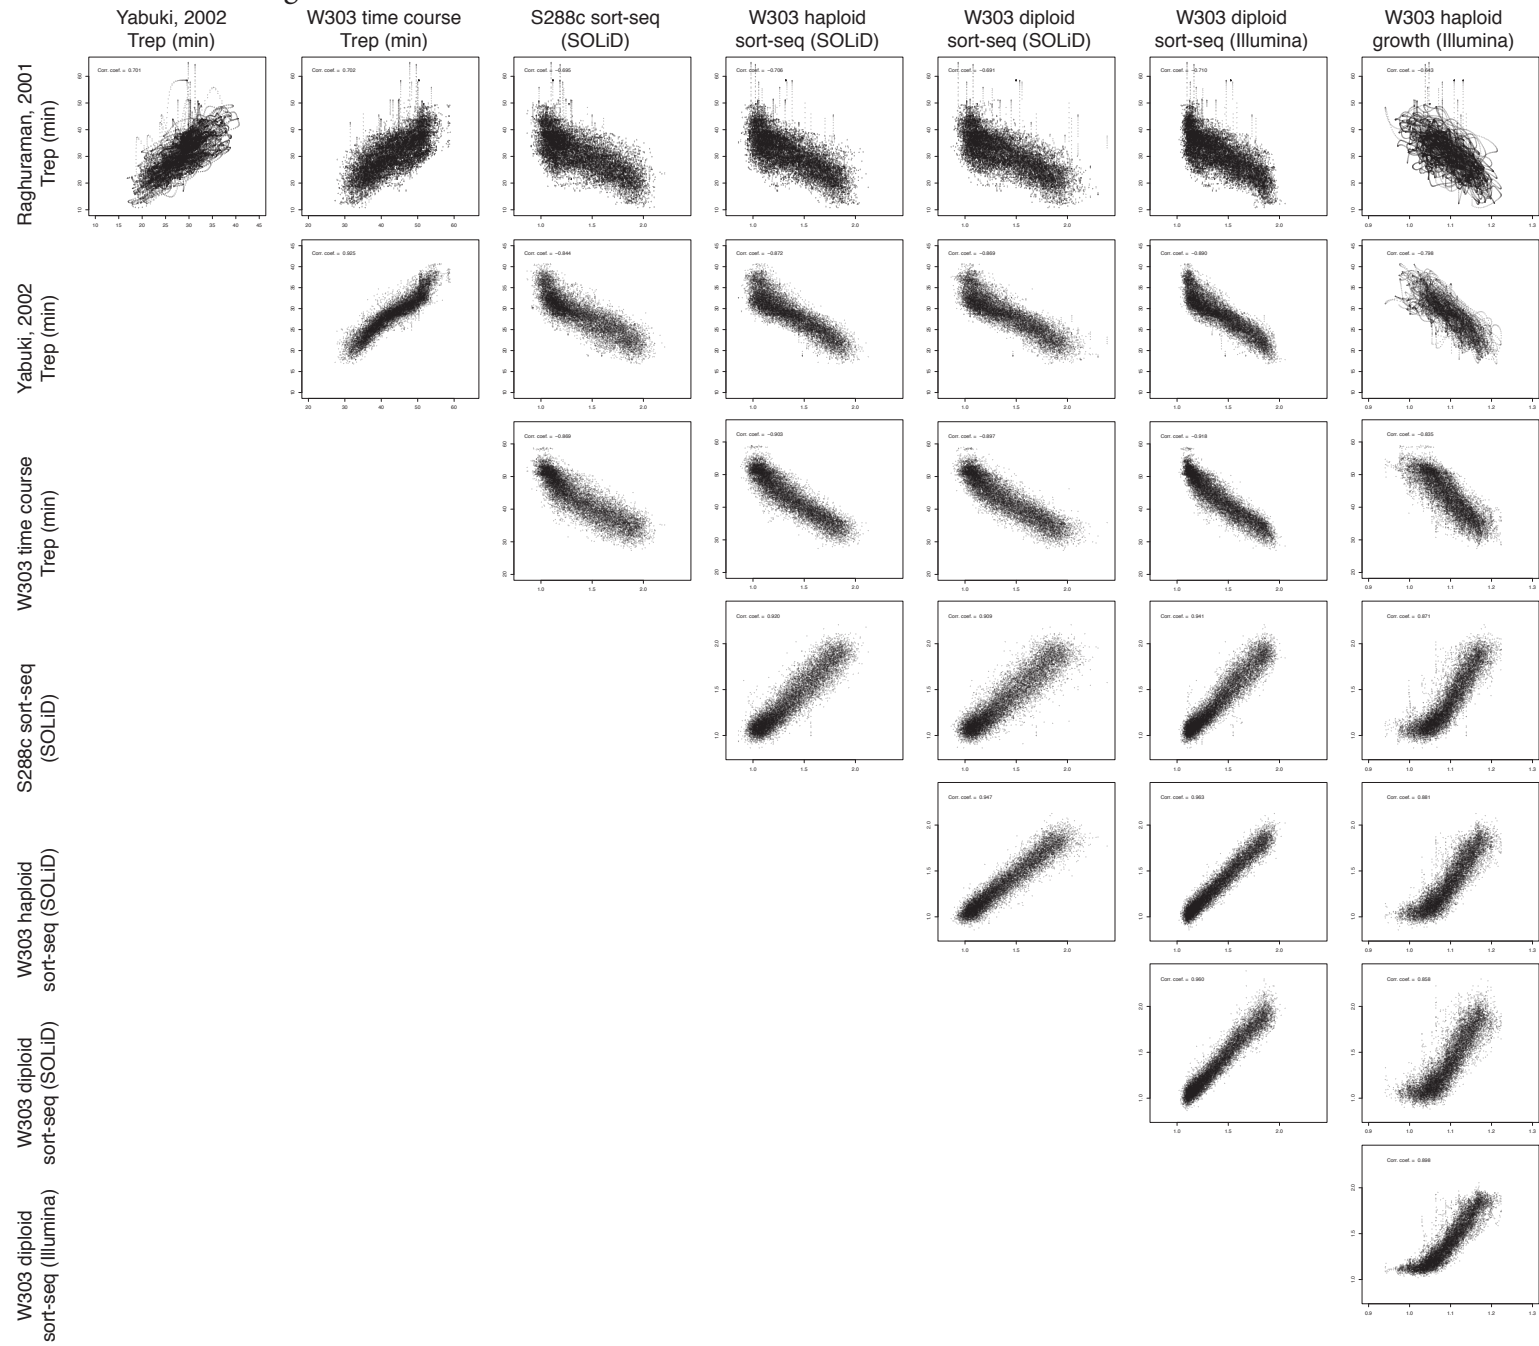



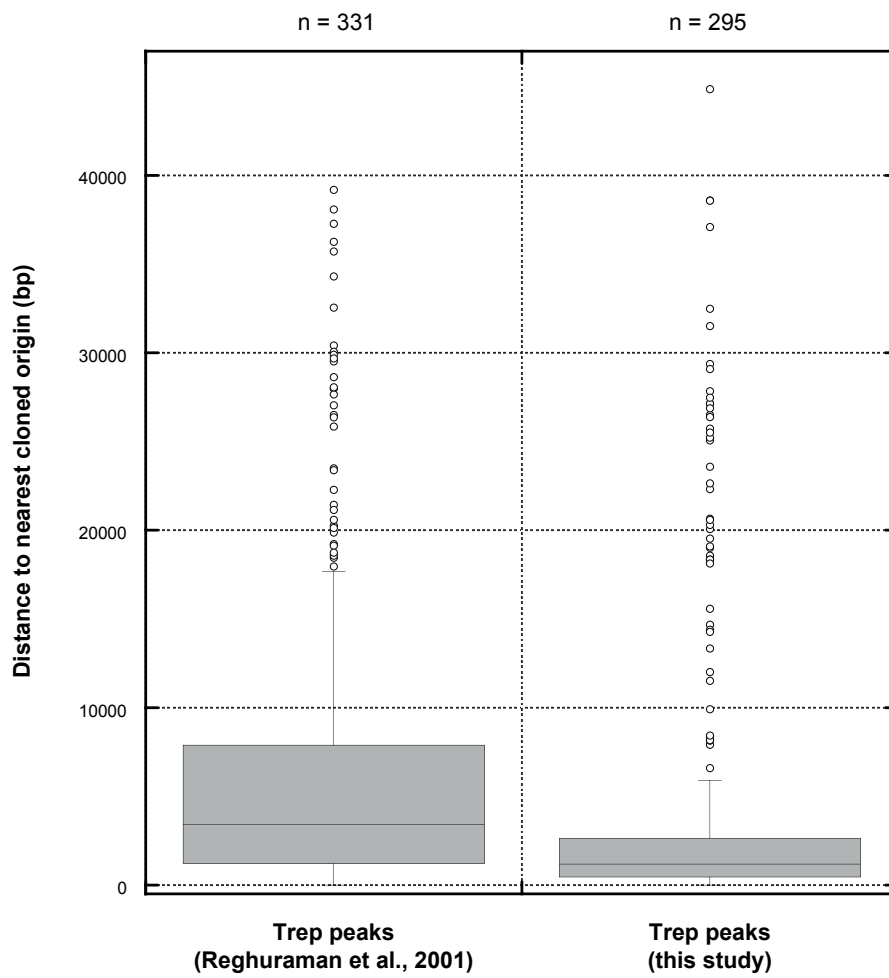

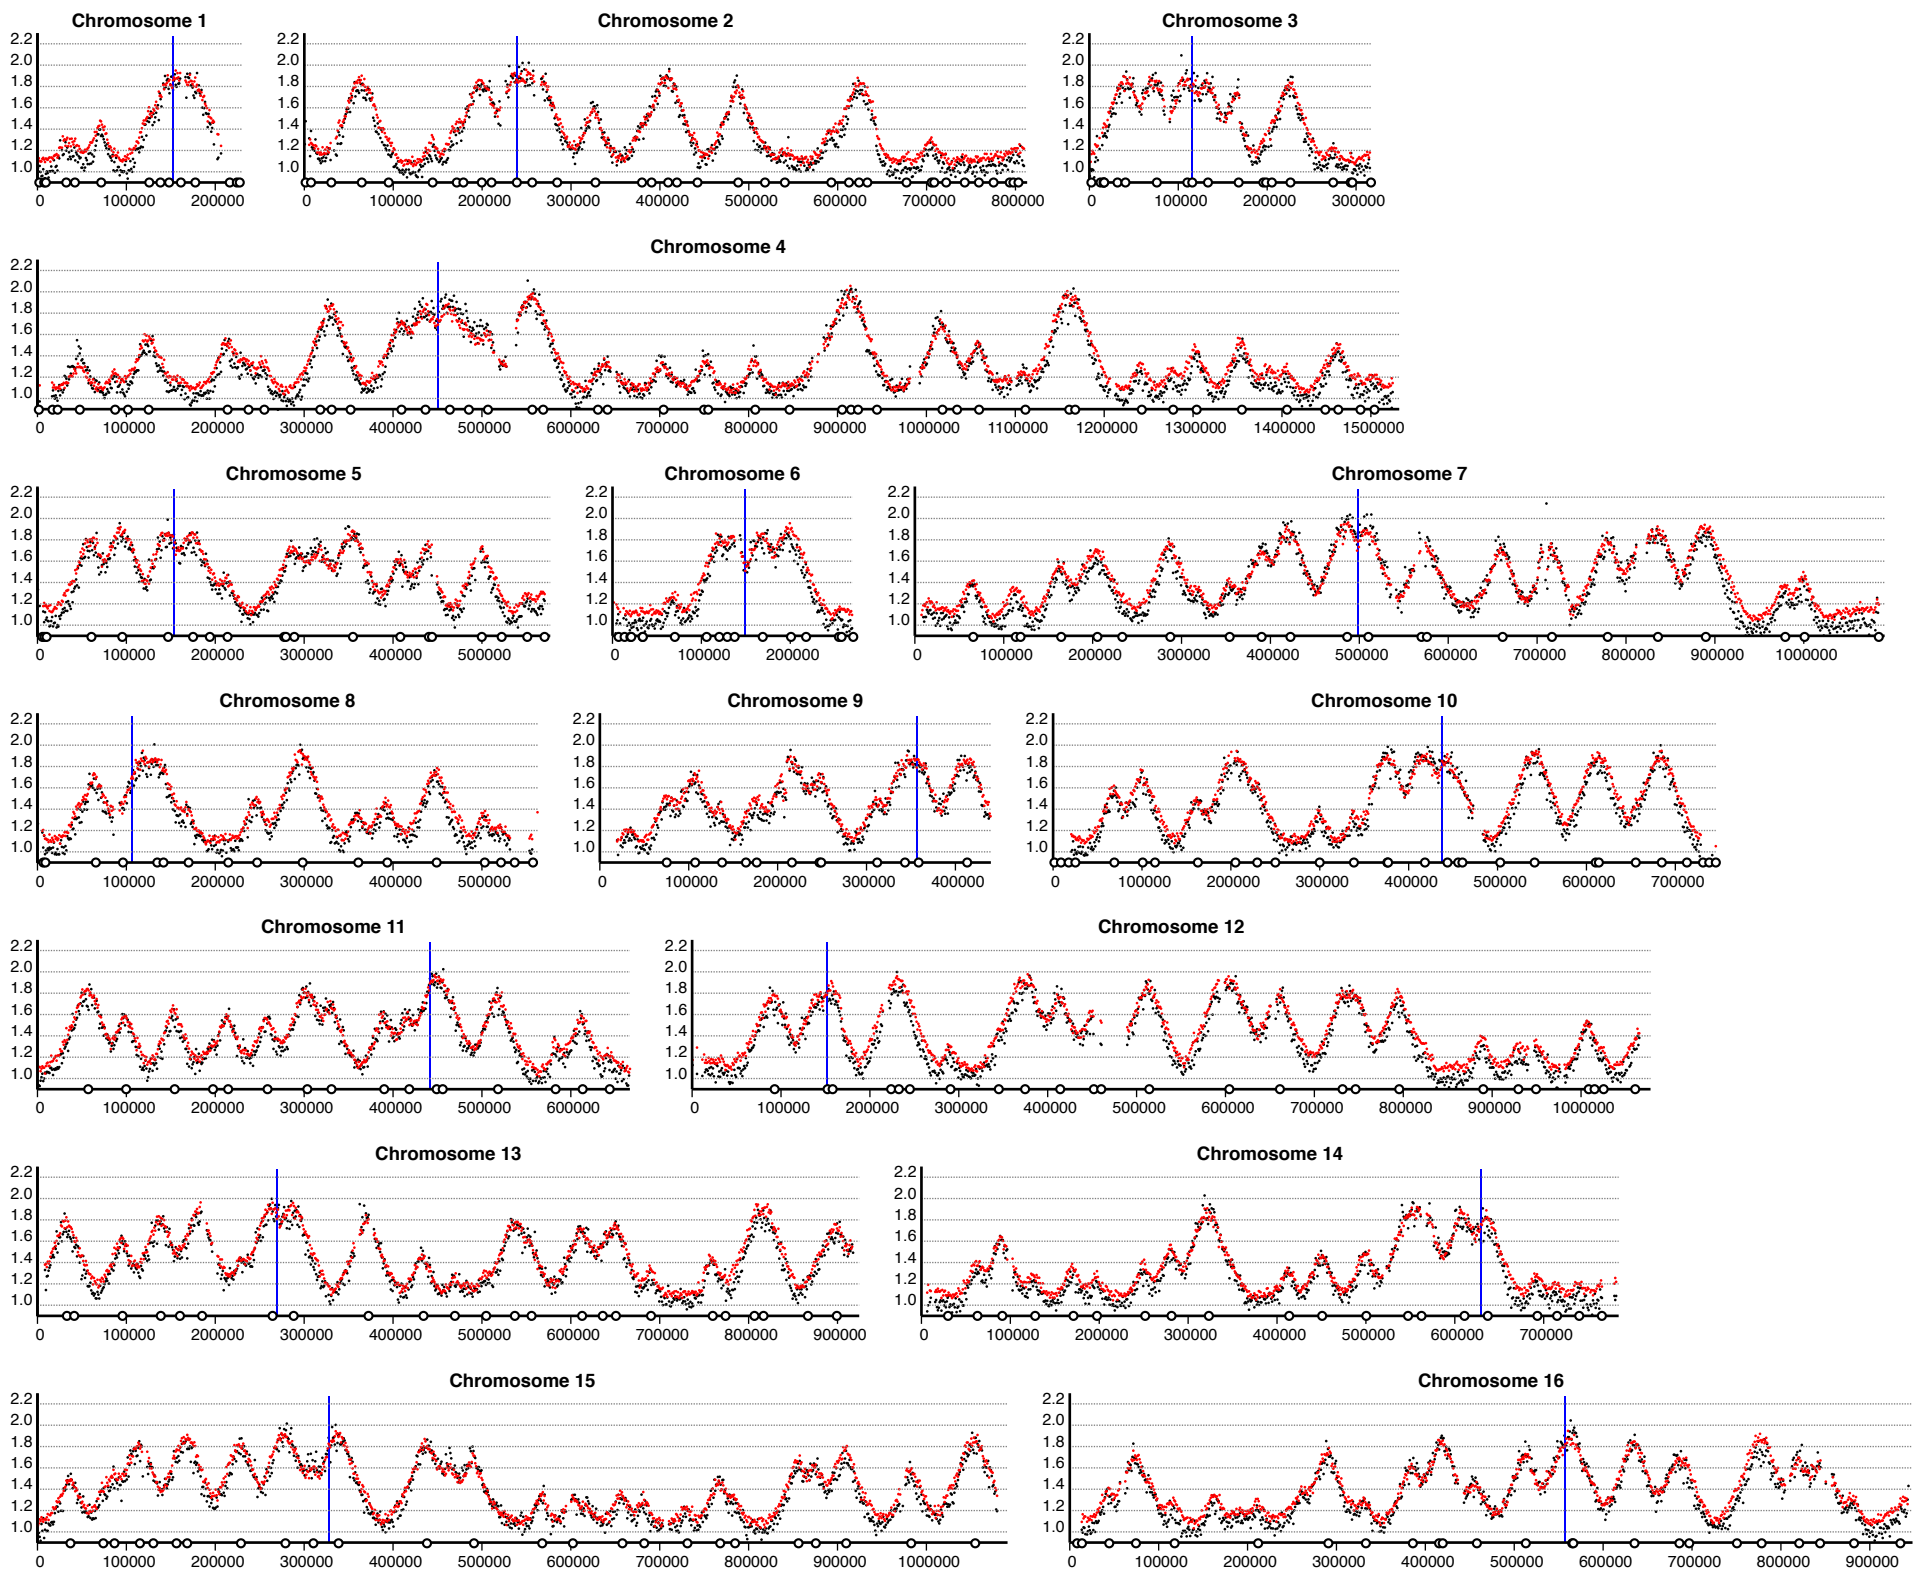

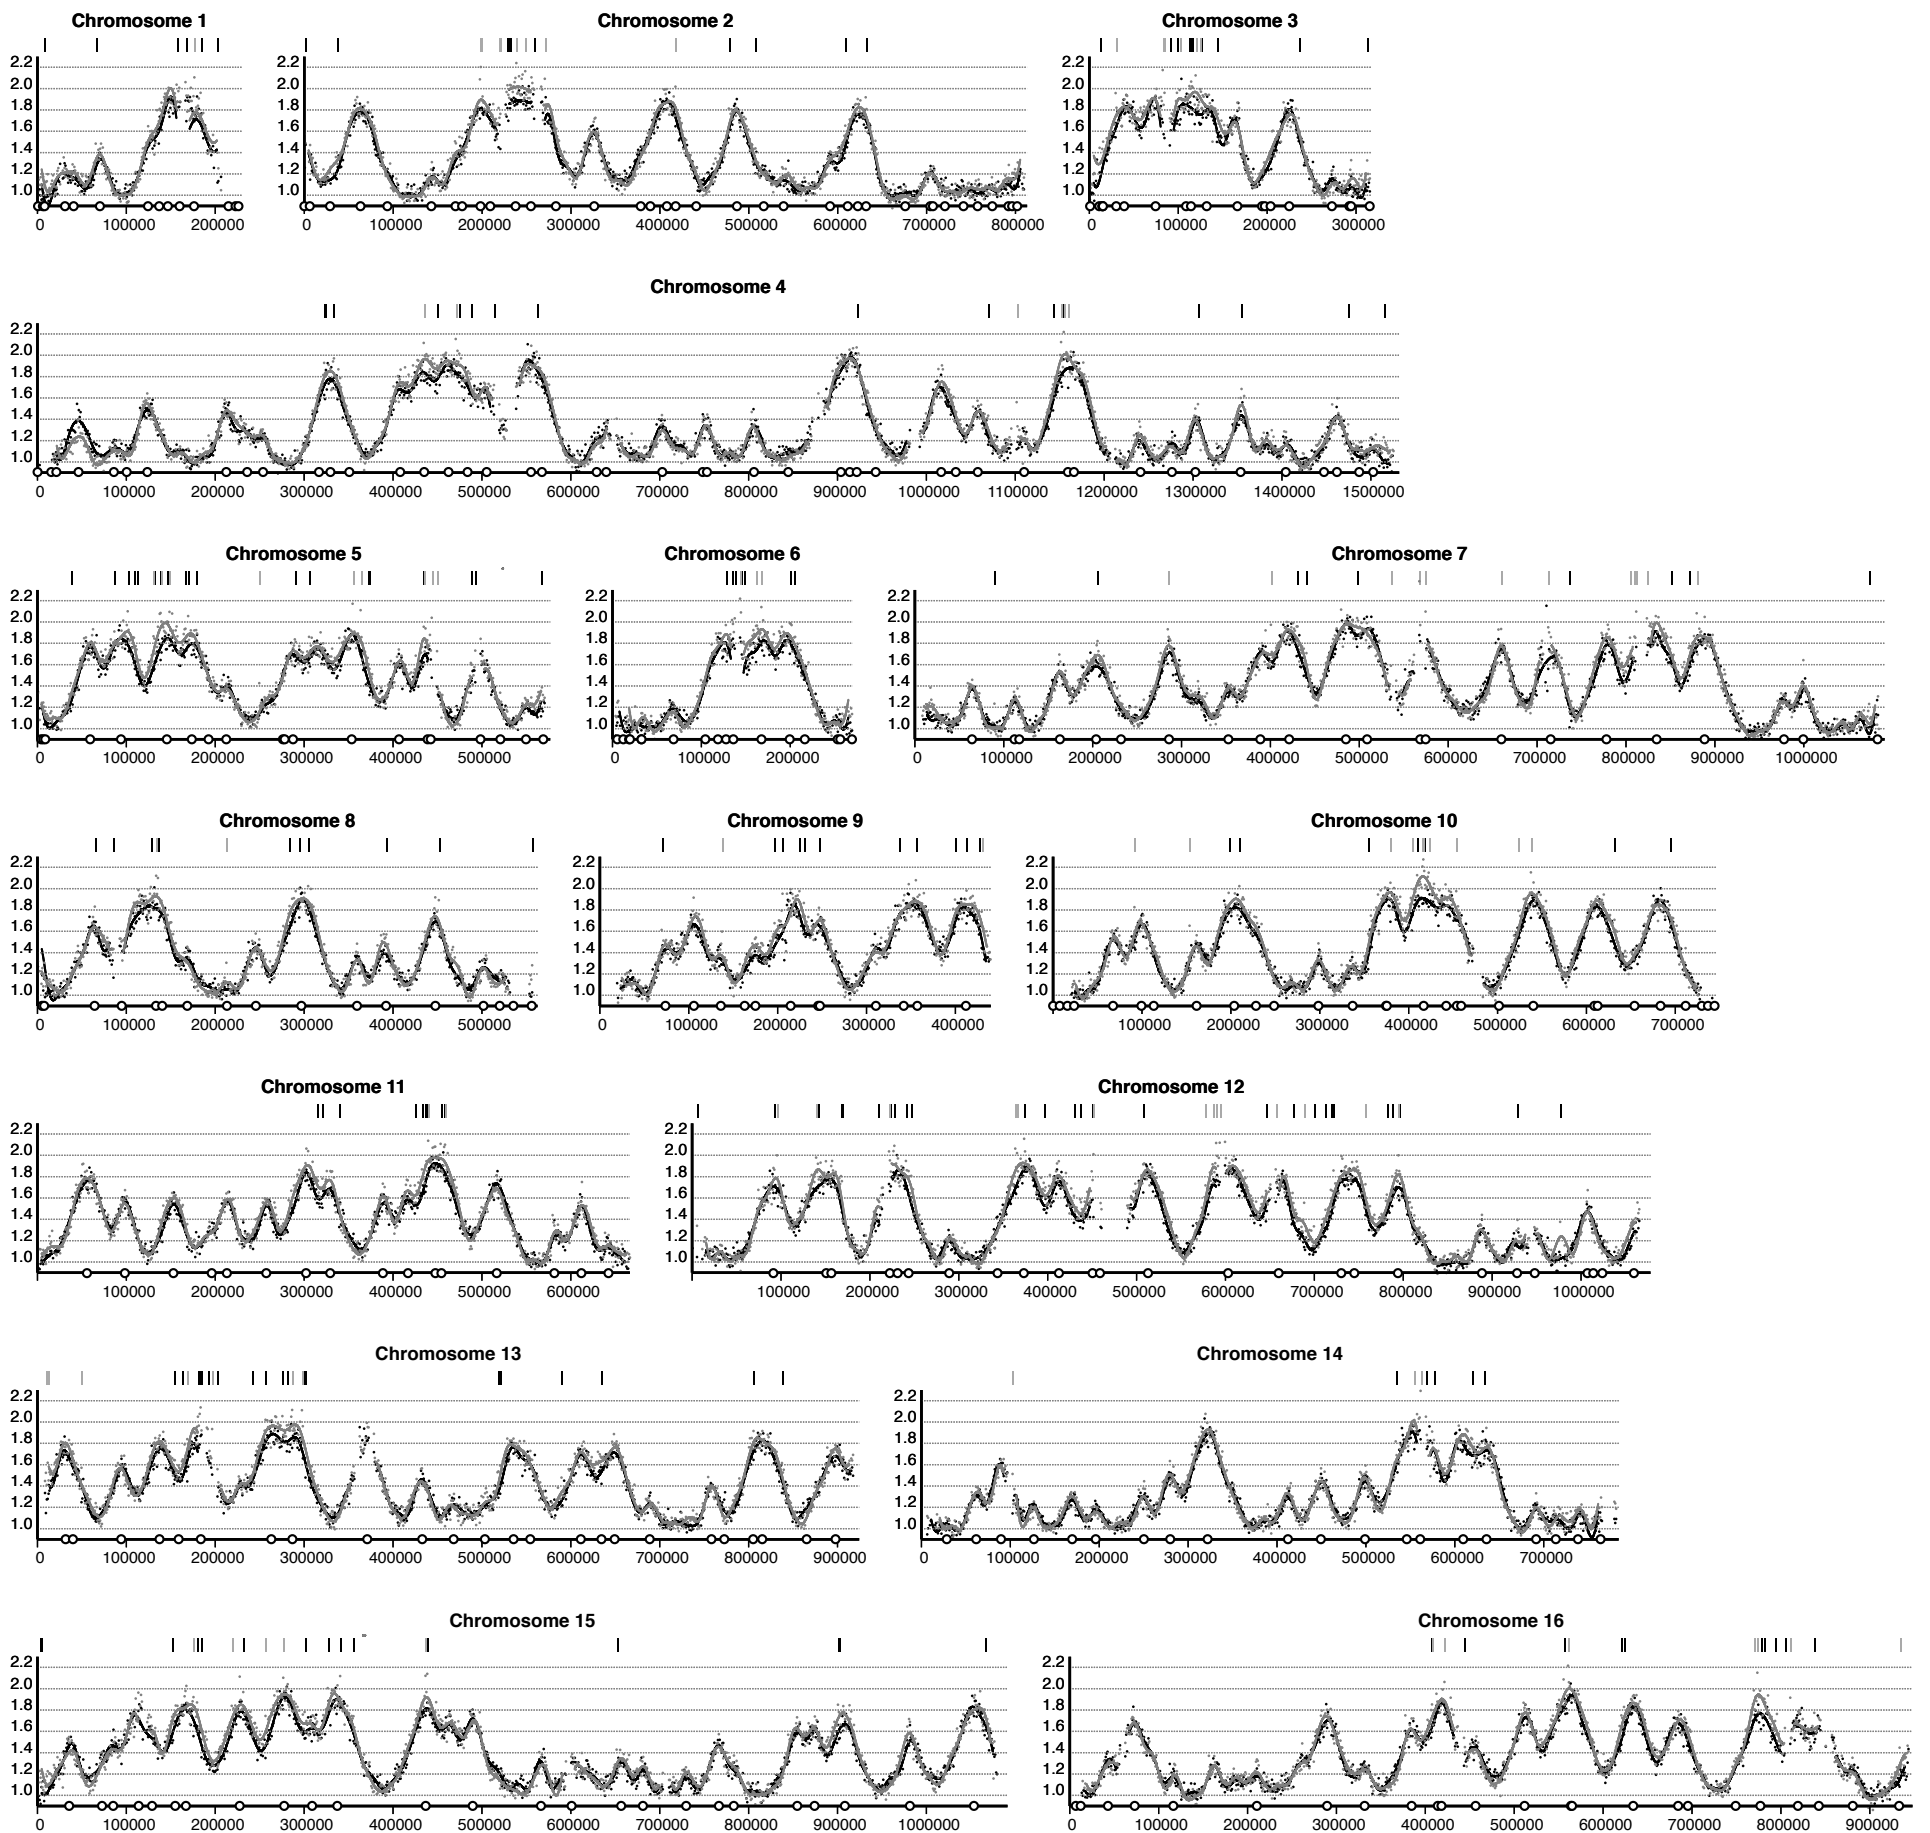

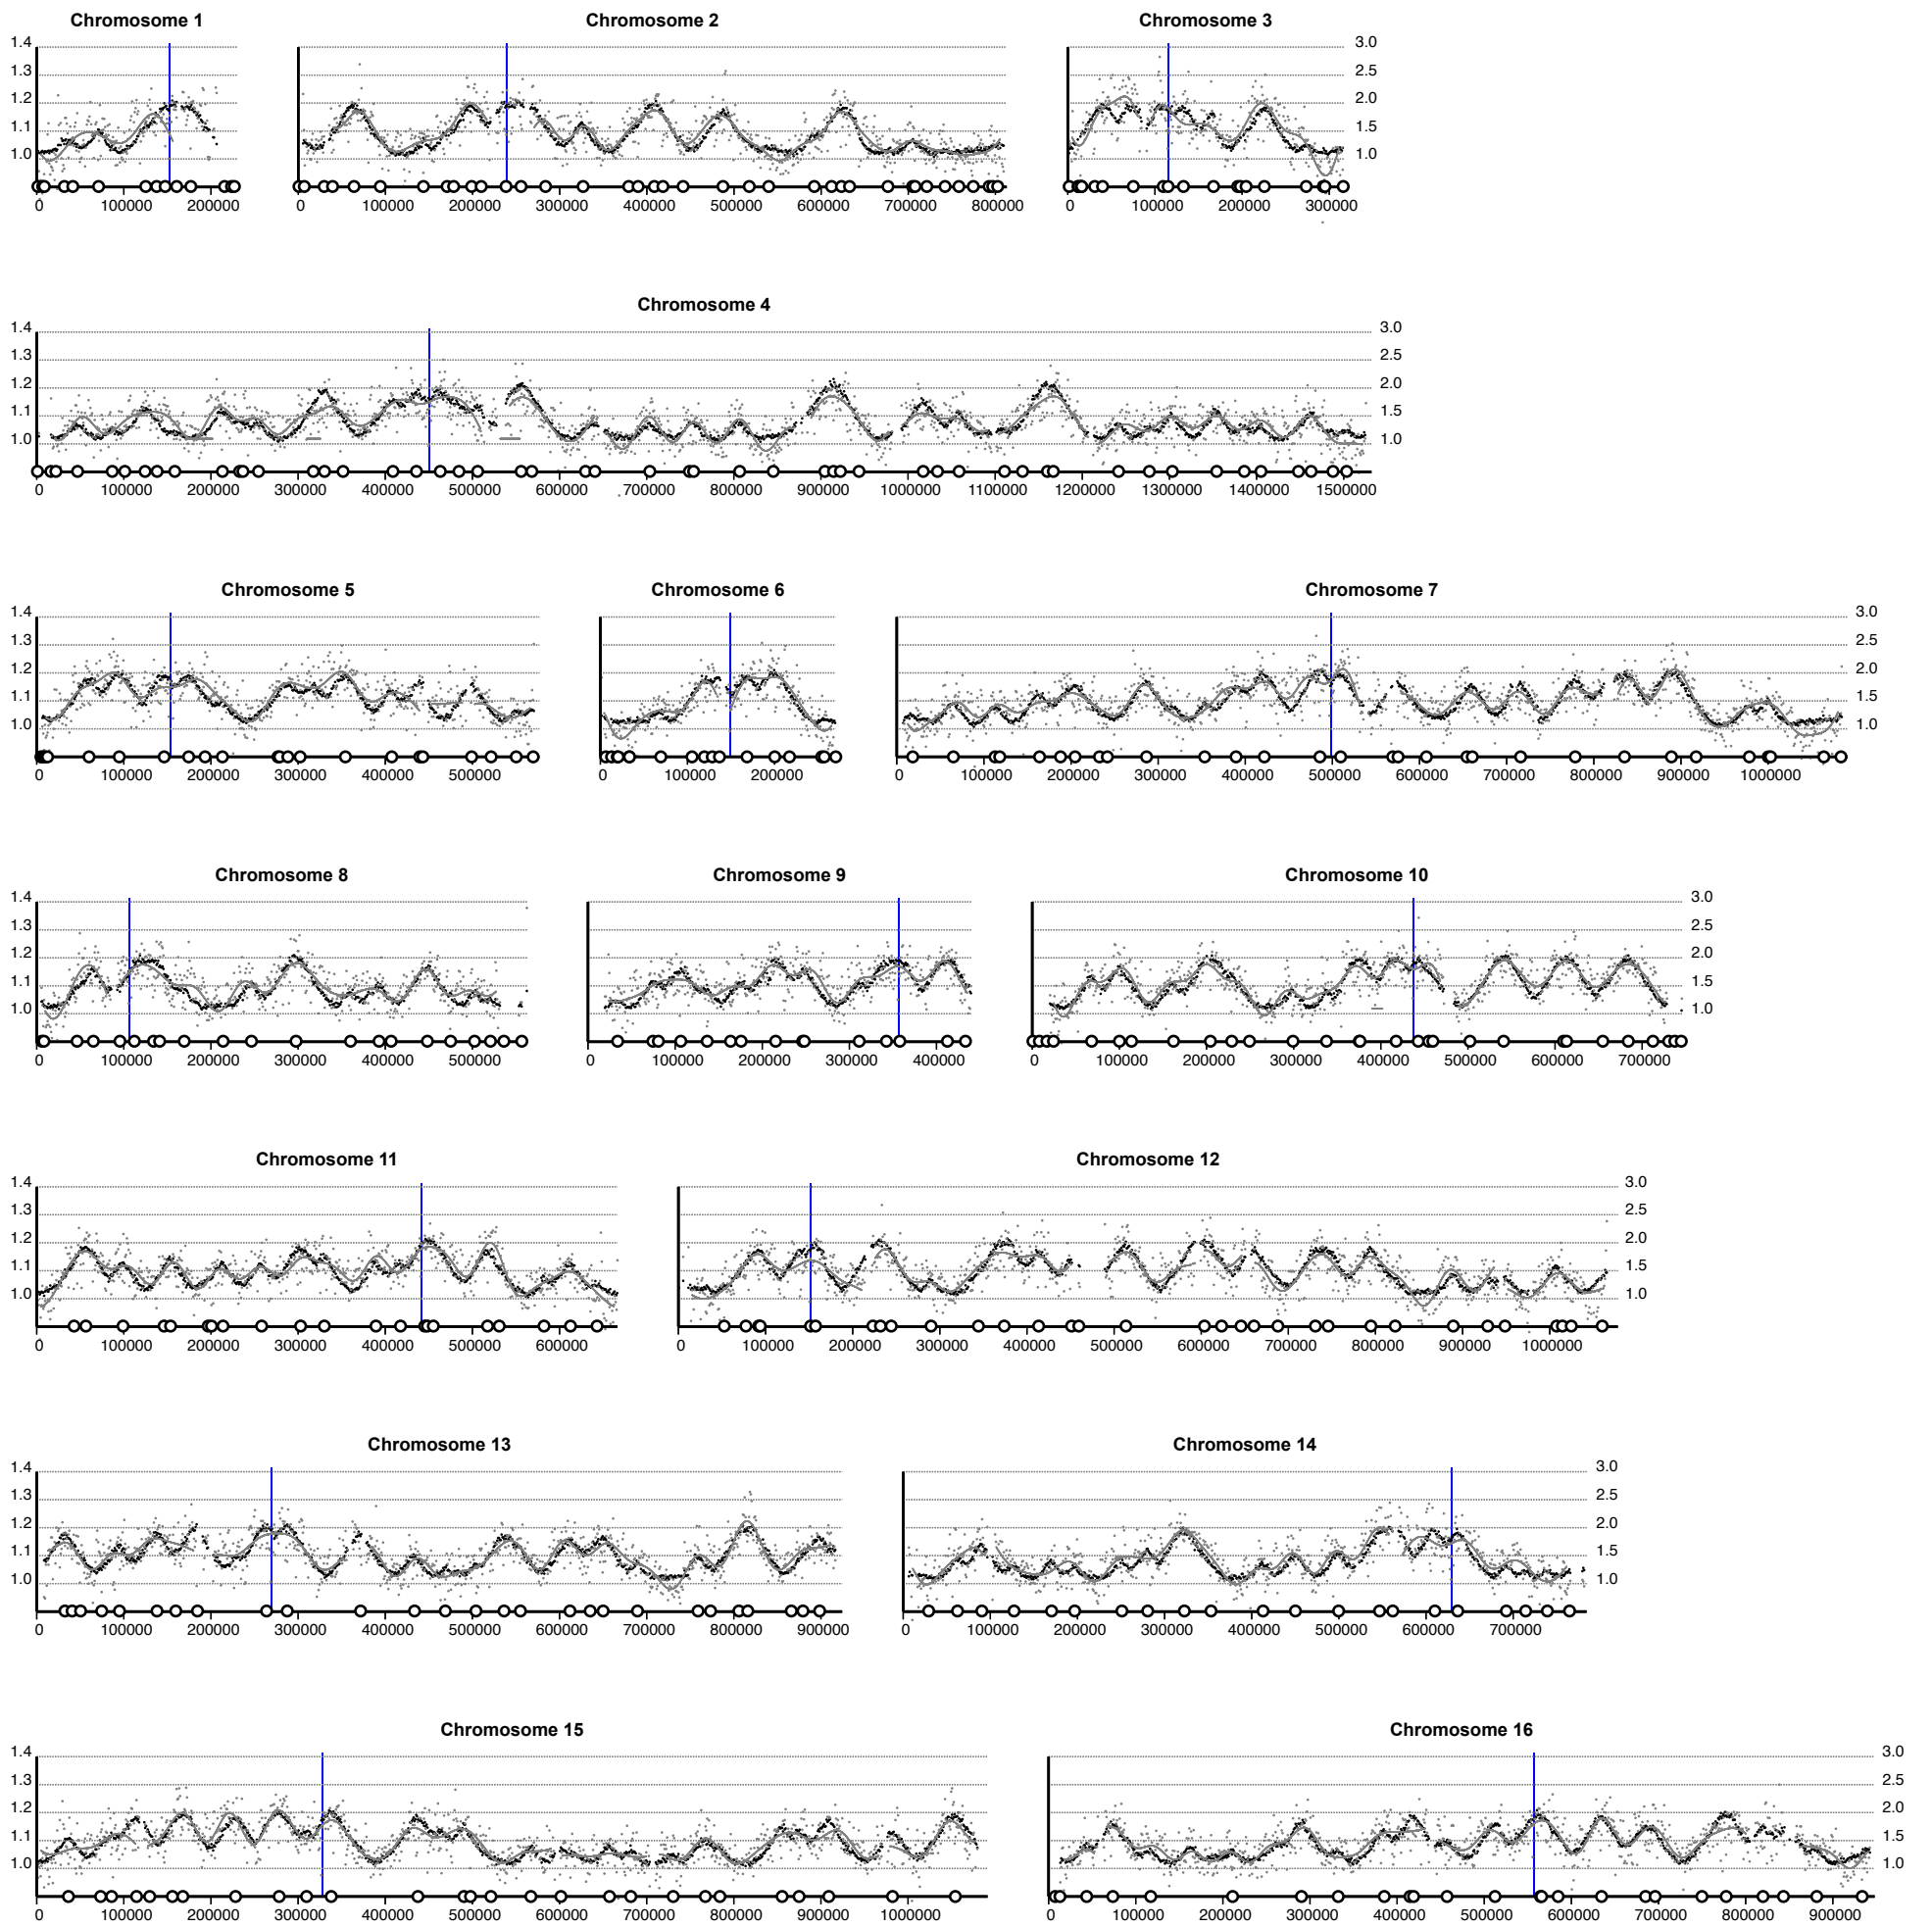

| Technology & sequencing platform | Strain & Selected Genotype                      | Library construction                                                  | Sample                  | Mean Copy Number by Flow Cytometry | Total Reads | Uniquely Mapping Reads |
|----------------------------------|-------------------------------------------------|-----------------------------------------------------------------------|-------------------------|------------------------------------|-------------|------------------------|
| <b>SOLiD</b><br>5500 system      | AUY077<br>MATa                                  | 5500 SOLiD Fragment library core kit (Applied biosystems, 4464412)    | Alpha factor arrest     | 1.00                               | 17,679,718  | 16,056,228             |
|                                  |                                                 |                                                                       | 25 min release          | 1.06                               | 23,564,200  | 20,997,274             |
|                                  |                                                 |                                                                       | 30 min release          | 1.09                               | 24,993,881  | 22,501,754             |
|                                  |                                                 |                                                                       | 35 min release          | 1.21                               | 26,283,891  | 23,893,069             |
|                                  |                                                 |                                                                       | 40 min release          | 1.40                               | 27,809,830  | 25,386,748             |
|                                  |                                                 |                                                                       | 45 min release          | 1.56                               | 23,736,925  | 21,968,165             |
|                                  |                                                 |                                                                       | 50 min release          | 1.68                               | 22,005,344  | 20,535,997             |
|                                  |                                                 |                                                                       | 90 min release          | 1.95                               | 32,053,518  | 29,619,880             |
| <b>SOLiD</b><br>3 plus system    | CAY106<br>MATa<br><i>rad53Δ</i><br><i>sml1Δ</i> | SOLiD Fragment Library Construction Kit (Applied biosystems, 4443471) | Alpha factor arrest     | N/A                                | 19,075,049  | 18,675,416             |
|                                  |                                                 |                                                                       | 60 min in HU            | N/A                                | 13,712,377  | 13,317,219             |
| <b>SOLiD</b><br>4 system         | T7107<br>Haploid                                | SOLiD Fragment Library Construction Kit (Applied biosystems, 4443471) | G2 phase sorted cells   | N/A                                | 21,461,618  | 20,442,400             |
|                                  |                                                 |                                                                       | S phase sorted cells    | N/A                                | 16,935,636  | 16,205,005             |
| <b>SOLiD</b><br>4 system         | T9475<br>Diploid                                | SOLiD Fragment Library Construction Kit (Applied biosystems, 4443471) | G2 phase sorted cells   | N/A                                | 45,368,930  | 43,734,400             |
|                                  |                                                 |                                                                       | S phase sorted cells    | N/A                                | 24,346,946  | 23,183,066             |
| <b>Illumina</b><br>HiSeq2000     | T9475<br>Diploid                                | NEBNext DNA Library Prep Master Mix Set for Illumina                  | G2 phase sorted cells   | N/A                                | 164,698,046 | 131,816,351            |
|                                  |                                                 |                                                                       | S phase sorted cells    | N/A                                | 195,717,543 | 155,734,122            |
| <b>Illumina</b><br>HiSeq2000     | T7107<br>Haploid                                | NEBNext DNA Library Prep Master Mix Set for Illumina                  | Stationary phase cells  | N/A                                | 293,409,051 | 234,532,691            |
|                                  |                                                 |                                                                       | Exponential phase cells | N/A                                | 262,092,475 | 213,008,532            |

Müller, Hawkins et al. (2013) Supplementary Table S1

Müller, Hawkins et al. (2013) Supplementary Table S2

| <b>Strain name</b> | <b>Genotype</b>                                                                                               | <b>Source</b>   |
|--------------------|---------------------------------------------------------------------------------------------------------------|-----------------|
| <b>AUY077</b>      | ade2-1 trp1-1 can1-100 leu2-3,112 his3-11,15 ura3<br>GAL+ ssd1,d2 RAD5+                                       | this study      |
| <b>CAY106</b>      | MATa; ade2-1; trp1-1; can1-100; leu2,3-112; his3-<br>11,15; ura3; ssd1: bar1::TRP1; sml1::URA3<br>rad53::LEU2 | this study      |
| <b>T7107</b>       | MATa, RAD5, BUD4, leu2, ura3, trp1, ade2, his3                                                                | Tomoyuki Tanaka |
| <b>T9475</b>       | MatA/MATalpha, RAD5/RAD5, BUD4/BUD4,<br>leu2/leu2, ura3/ura3, trp1/trp1, ade2/ade2, his3/his3                 | Tomoyuki Tanaka |

| <b>Origin name</b> | <b>ACS sequence</b> | <b>Reference</b>              |
|--------------------|---------------------|-------------------------------|
| ARS202             | TTTTAATTTTT         | This study                    |
| ARS209             | TTTTATGTTTT         | (Bouton and Smith)            |
| ARS214             | ATTTATATTTT         | (Hoggard <i>et al.</i> )      |
| ARS219.5           | TTCTATATTTT         | (Hoggard <i>et al.</i> )      |
| ARS224             | TTTAACGTTTT         | This study                    |
| ARS301             | TTTTATGTTTT         | (Sharma <i>et al.</i> )       |
| ARS302             | TTTTATATTTT         | (Sharma <i>et al.</i> )       |
| ARS303             | ATTTATATTTT         | (Vujcic <i>et al.</i> )       |
| ARS304             | TTATAAATT           | (Bouton and Smith 1986)       |
| ARS305             | TTATATGTTTT         | (Huang and Kowalski)          |
| ARS306             | ATTTATATTTA         | (Theis <i>et al.</i> )        |
| ARS307             | ATTTATGTTTT         | (Palzkill and Newlon)         |
| ARS309             | GTTTATATCTT         | (Theis and Newlon)            |
| ARS310             | TTTTACTTTTT         | (Theis and Newlon)            |
| ARS313             | TTTTACTTTTA         | (Chang <i>et al.</i> )        |
| ARS315             | TTTTATGTTTT         | (Crampton <i>et al.</i> )     |
| ARS316             | TTTCAAATTTA         | (Chang <i>et al.</i> )        |
| ARS317             | TTTTATATTTA         | (Chang <i>et al.</i> )        |
| ARS318             | TATCATGTTTT         | (Chang <i>et al.</i> )        |
| ARS319             | TTTTATGTTTA         | (Chang <i>et al.</i> )        |
| ARS320             | TTTTATGTTAT         | (Vujcic <i>et al.</i> )       |
| ARS404             | TTTAATATTTT         | (Kearsey)                     |
| ARS416             | TTTTATGTTTA         | (Celniker <i>et al.</i> )     |
| ARS422             | ATTAATGTTTT         | This study                    |
| ARS423             | TTTTACATTTT         | (Hoggard <i>et al.</i> )      |
| ARS428             | TTTTATATTTT         | (Hoggard <i>et al.</i> )      |
| ARS432             | TTTTTTTTCTTTTCT     | (Nieduszynski <i>et al.</i> ) |
| ARS432.5           | TTATTTACATTTTGT     | (Nieduszynski <i>et al.</i> ) |
| ARS442             | ATTTATGTTTA         | (Hoggard <i>et al.</i> )      |
| ARS512             | AATTATGTTTA         | (Hoggard <i>et al.</i> )      |



|          |                  |                               |
|----------|------------------|-------------------------------|
| ARS514   | ATTTATGTTTT      | (Hoggard <i>et al.</i> )      |
| ARS516   | ATTTACTTTTT      | (Hoggard <i>et al.</i> )      |
| ARS601   | ATTTCCATTTT      | (Shirahige <i>et al.</i> )    |
| ARS602   | TTATACGTTTA      | (Shirahige <i>et al.</i> )    |
| ARS603   | TTTAAAGTTTT      | (Shirahige <i>et al.</i> )    |
| ARS603   | TTTCATATTTT      | (Shirahige <i>et al.</i> )    |
| ARS603.5 | TTCCATATTTT      | (Yamashita <i>et al.</i> )    |
| ARS604   | TTTTACGTTTT      | (Shirahige <i>et al.</i> )    |
| ARS605   | AATTACGTTTT      | (Shirahige <i>et al.</i> )    |
| ARS606   | ATTTATATTTT      | (Shirahige <i>et al.</i> )    |
| ARS607   | GTTTATATTTA      | (Shirahige <i>et al.</i> )    |
| ARS608   | TTTTACTTTTA      | (Shirahige <i>et al.</i> )    |
| ARS609   | TTTTATGTTTT      | (Shirahige <i>et al.</i> )    |
| ARS702   | TTTTTAATATTTTGT  | (Nieduszynski <i>et al.</i> ) |
| ARS704   | TTTTATACGTTTATG  | (Nieduszynski <i>et al.</i> ) |
| ARS707   | CATTTTATAATTTGT  | (Nieduszynski <i>et al.</i> ) |
| ARS710   | TTTTTTATATTTTATT | (Nieduszynski <i>et al.</i> ) |
| ARS714   | TTATTTACTTTTAGT  | (Nieduszynski <i>et al.</i> ) |
| ARS716   | AATTACGTTTA      | (Hoggard <i>et al.</i> )      |
| ARS717   | TTATTTAACTTTTGT  | (Nieduszynski <i>et al.</i> ) |
| ARS718   | AAATTATTGTTTAGT  | (Nieduszynski <i>et al.</i> ) |
| ARS719   | TTATTTATGTTTTGC  | (Nieduszynski <i>et al.</i> ) |
| ARS721   | GTATTTATATTTAGC  | (Nieduszynski <i>et al.</i> ) |
| ARS727   | TATTTTATGTTTACT  | (Nieduszynski <i>et al.</i> ) |
| ARS728   | TTGTTTATATTTTGT  | (Nieduszynski <i>et al.</i> ) |
| ARS729   | TTTTTTACCTTTTGT  | (Nieduszynski <i>et al.</i> ) |
| ARS731   | TGTATATAGTTTAGT  | (Nieduszynski <i>et al.</i> ) |
| ARS731.5 | ATTTTAATATTTTGT  | (Nieduszynski <i>et al.</i> ) |
| ARS733   | TTTTTTAATTTTTTTT | (Nieduszynski <i>et al.</i> ) |
| ARS809   | TTAGACATTTA      | (Hoggard <i>et al.</i> )      |
| ARS818   | TTTCATGTTTT      | (Hoggard <i>et al.</i> )      |
| ARS822   | TTATACATTTT      | (Hoggard <i>et al.</i> )      |
| ARS911   | GTTTATGTTTT      | (Hoggard <i>et al.</i> )      |

|           |                 |                               |
|-----------|-----------------|-------------------------------|
| ARS920    | TTTTATATTTT     | (Hoggard <i>et al.</i> )      |
| ARS1001   | TTTTATGTTTA     | (Xu <i>et al.</i> )           |
| ARS1002   | TTTTATGTTTA     | (Xu <i>et al.</i> )           |
| ARS1003   | TTTTATTTTTA     | (Xu <i>et al.</i> )           |
| ARS1004   | TTTTTAGTTTT     | (Xu <i>et al.</i> )           |
| ARS1005   | TTATATGTTTT     | (Xu <i>et al.</i> )           |
| ARS1007   | ATATATATTTA     | (Xu <i>et al.</i> )           |
| ARS1007.5 | ATCTATGTTTA     | (Xu <i>et al.</i> )           |
| ARS1009   | ATTTATATTTA     | (Xu <i>et al.</i> )           |
| ARS1011   | TTTTATGTTTA     | (Xu <i>et al.</i> )           |
| ARS1014   | TTTTATATTTA     | (Xu <i>et al.</i> )           |
| ARS1015   | ATTTATATTTT     | (Xu <i>et al.</i> )           |
| ARS1018   | TTTTACATTTA     | (Xu <i>et al.</i> )           |
| ARS1019   | TTTTATCTTTA     | (Xu <i>et al.</i> )           |
| ARS1020   | ATTTACATTTT     | (Xu <i>et al.</i> )           |
| ARS1021   | TTGTTTAACATTAGT | (Nieduszynski <i>et al.</i> ) |
| ARS105    | ATTAACAATTA     | (Hoggard <i>et al.</i> )      |
| ARS1114   | TTTTATGTTTT     | (Hoggard <i>et al.</i> )      |
| ARS1118   | TTTTACATTTA     | This study                    |
| ARS1123   | TTTTATATTTA     | (Hoggard <i>et al.</i> )      |
| ARS1216.5 | GTTTATGTTTT     | (Nieduszynski <i>et al.</i> ) |
| ARS1307   | ATTTATGTTTT     | (Hoggard <i>et al.</i> )      |
| ARS1320   | ATTTATATTTA     | (Hoggard <i>et al.</i> )      |
| ARS1323   | GTTTATGTTTA     | (Hoggard <i>et al.</i> )      |
| ARS1324   | TTTTACTATTT     | This study                    |
| ARS1325   | TTTCATATTTT     | (Hoggard <i>et al.</i> )      |
| ARS1329   | ATTTAGTCTTT     | (Hoggard <i>et al.</i> )      |
| ARS1332   | TTTTATGTTTG     | (Hoggard <i>et al.</i> )      |
| ARS1405   | TTTTATTTTTA     | (Hoggard <i>et al.</i> )      |
| ARS1413   | ATTTGTATTTA     | (Friedman <i>et al.</i> )     |
| ARS1420   | CTTTATGTTTA     | (Hoggard <i>et al.</i> )      |
| ARS1513   | TTTTACCTTTT     | (Hoggard <i>et al.</i> )      |
| ARS1521   | TTTTATATTTT     | (Hoggard <i>et al.</i> )      |

|                  |                   |                               |
|------------------|-------------------|-------------------------------|
| <b>ARS1526</b>   | ATTTAATATTTGTT    | (Nieduszynski <i>et al.</i> ) |
| <b>ARS1528</b>   | TTTGTTTATGTTTAGGT | (Breier <i>et al.</i> )       |
| <b>ARS1528</b>   | GTTTATGTTTA       | (Hoggard <i>et al.</i> )      |
| <b>ARS1529.5</b> | TTGTTTAAATTTTGT   | (Nieduszynski <i>et al.</i> ) |
| <b>ARS1529.5</b> | GTTTAAATTTT       | (Hoggard <i>et al.</i> )      |
| <b>ARS1625</b>   | ATTTACGTTTA       | (Hoggard <i>et al.</i> )      |
| <b>ARS1626.5</b> | TTATTTATATTTTGG   | (Nieduszynski <i>et al.</i> ) |
| <b>ARS1631</b>   | TTTTATATTTG       | (Hoggard <i>et al.</i> )      |

- Bouton AH, Smith MM. 1986. Fine-structure analysis of the DNA sequence requirements for autonomous replication of *Saccharomyces cerevisiae* plasmids. *Molecular and cellular biology* **6**(7): 2354-2363.
- Breier AM, Chatterji S, Cozzarelli NR. 2004. Prediction of *Saccharomyces cerevisiae* replication origins. *Genome Biol* **5**(4): R22.
- Celniker SE, Sweder K, Srienc F, Bailey JE, Campbell JL. 1984. Deletion mutations affecting autonomously replicating sequence ARS1 of *Saccharomyces cerevisiae*. *Molecular and cellular biology* **4**(11): 2455-2466.
- Chang F, Theis JF, Miller J, Nieduszynski CA, Newlon CS, Weinreich M. 2008. Analysis of chromosome III replicators reveals an unusual structure for the ARS318 silencer origin and a conserved WTW sequence within the origin recognition complex binding site. *Mol Cell Biol* **28**(16): 5071-5081.
- Crampton A, Chang F, Pappas DL, Frisch RL, Weinreich M. 2008. An ARS element inhibits DNA replication through a SIR2-dependent mechanism. *Mol Cell* **30**(2): 156-166.
- Friedman KL, Diller JD, Ferguson BM, Nyland SV, Brewer BJ, Fangman WL. 1996. Multiple determinants controlling activation of yeast replication origins late in S phase. *Genes Dev* **10**(13): 1595-1607.
- Hoggard T, Shor E, Müller CA, Nieduszynski CA, Fox CA. 2013. Linking ORC-Origin Binding Mechanisms to the Regulation of Origin Activation Time. *PLoS Genet*, in press.
- Huang RY, Kowalski D. 1996. Multiple DNA elements in ARS305 determine replication origin activity in a yeast chromosome. *Nucleic Acids Res* **24**(5): 816-823.
- Kearsey S. 1984. Structural requirements for the function of a yeast chromosomal replicator. *Cell* **37**(1): 299-307.
- Nieduszynski CA, Knox Y, Donaldson AD. 2006. Genome-wide identification of replication origins in yeast by comparative genomics. *Genes Dev* **20**(14): 1874-1879.
- Palzkill TG, Newlon CS. 1988. A yeast replication origin consists of multiple copies of a small conserved sequence. *Cell* **53**(3): 441-450.
- Sharma K, Weinberger M, Huberman JA. 2001. Roles for internal and flanking sequences in regulating the activity of mating-type-silencer-associated replication origins in *Saccharomyces cerevisiae*. *Genetics* **159**(1): 35-45.
- Shirahige K, Iwasaki T, Rashid MB, Ogasawara N, Yoshikawa H. 1993. Location and characterization of autonomously replicating sequences from chromosome VI of *Saccharomyces cerevisiae*. *Mol Cell Biol* **13**: 5043-5056.
- Theis JF, Newlon CS. 1997. The ARS309 chromosomal replicator of *Saccharomyces cerevisiae* depends on an exceptional ARS consensus sequence. *Proc Natl Acad Sci U S A* **94**(20): 10786-10791.
- Theis JF, Newlon CS. 2001. Two compound replication origins in *Saccharomyces cerevisiae* contain redundant origin recognition complex binding sites. *Mol Cell Biol* **21**(8): 2790-2801.

- Theis JF, Yang C, Schaefer CB, Newlon CS. 1999. DNA sequence and functional analysis of homologous ARS elements of *Saccharomyces cerevisiae* and *S. carlsbergensis*. *Genetics* **152**(3): 943-952.
- Vujcic M, Miller CA, Kowalski D. 1999. Activation of silent replication origins at autonomously replicating sequence elements near the HML locus in budding yeast. *Mol Cell Biol* **19**(9): 6098-6109.
- Xu W, Aparicio JG, Aparicio OM, Tavaré S. 2006. Genome-wide mapping of ORC and Mcm2p binding sites on tiling arrays and identification of essential ARS consensus sequences in *S. cerevisiae*. *BMC Genomics* **7**: 276.
- Yamashita M, Hori Y, Shinomiya T, Obuse C, Tsurimoto T, Yoshikawa H, Shirahige K. 1997. The efficiency and timing of initiation of replication of multiple replicons of *Saccharomyces cerevisiae* chromosome VI. *Genes to Cells* **2**: 655-666.
